# Supplementary material
Source: PubMed Central journal article supplement (PMC7201866)
Supplement: NIHMS1582301-supplement-Supporting_Information.pdf [file NIHMS1582301-supplement-Supporting_Information.pdf]

Supporting Information for:

***Group 4 Diaryl Metallocenes as Bespoke Aryne Precursors for Ti-Catalyzed [2 + 2 + 2]***

***Cycloaddition of Arynes and Alkynes***

*Benjamin R. Reiner, Ian A. Tonks\**

Department of Chemistry, University of Minnesota-Twin Cities, 207 Pleasant Street SE,  
Minneapolis, Minnesota 55455, United States

Email: itonks@umn.edu

| <b>Table of Contents .....</b>                                                                                                                                                                                                                                                                                                                         | <b>Page</b> |
|--------------------------------------------------------------------------------------------------------------------------------------------------------------------------------------------------------------------------------------------------------------------------------------------------------------------------------------------------------|-------------|
| <b>Figure S1.</b> Table 2, entry 1a - <sup>1</sup> H NMR (C <sub>6</sub> D <sub>5</sub> Br) spectrum of the attempted formal [2+2+2] cycloaddition of 3-hexyne and Cp* <sub>2</sub> ZrPh <sub>2</sub> with TiI <sub>4</sub> (THF) <sub>2</sub> (1 mol %), Zn <sup>0</sup> (1 mol %), and 1,3,5-trimethoxybenzene internal standard. ....               | 3           |
| <b>Figure S2.</b> Table 2, entry 1a - Quantitative GC-FID spectrum of the attempted formal [2+2+2] cycloaddition of 3-hexyne and Cp* <sub>2</sub> ZrPh <sub>2</sub> with TiI <sub>4</sub> (THF) <sub>2</sub> (1 mol %), Zn <sup>0</sup> (1 mol %), and 1,3,5-trimethoxybenzene internal standard. ....                                                 | 4           |
| <b>Figure S3.</b> Table 2, entry 1b - <sup>1</sup> H NMR (C <sub>6</sub> D <sub>5</sub> Br) spectrum of the attempted formal [2+2+2] cycloaddition of 4-octyne and Cp* <sub>2</sub> ZrPh <sub>2</sub> with TiI <sub>4</sub> (THF) <sub>2</sub> (1 mol %), Zn <sup>0</sup> (1 mol %), and 1,3,5-trimethoxybenzene internal standard. ....               | 5           |
| <b>Figure S4.</b> Table 2, entry 1b - Quantitative GC-FID spectrum of the attempted formal [2+2+2] cycloaddition of 4-octyne and Cp* <sub>2</sub> ZrPh <sub>2</sub> with TiI <sub>4</sub> (THF) <sub>2</sub> (1 mol %), Zn <sup>0</sup> (1 mol %), and 1,3,5-trimethoxybenzene internal standard. ....                                                 | 6           |
| <b>Figure S5.</b> Table 2, entry 1c - <sup>1</sup> H NMR (C <sub>6</sub> D <sub>5</sub> Br) spectrum of the attempted formal [2+2+2] cycloaddition of trimethylsilylacetylene and Cp* <sub>2</sub> ZrPh <sub>2</sub> with TiI <sub>4</sub> (THF) <sub>2</sub> (1 mol %), Zn <sup>0</sup> (1 mol %), and 1,3,5-trimethoxybenzene internal standard..... | 7           |
| <b>Figure S6.</b> Table 2, entry 1d - <sup>1</sup> H NMR (C <sub>6</sub> D <sub>5</sub> Br) spectrum of the attempted formal [2+2+2] cycloaddition of phenylacetylene and Cp* <sub>2</sub> ZrPh <sub>2</sub> with TiI <sub>4</sub> (THF) <sub>2</sub> (1 mol %), Zn <sup>0</sup> (1 mol %), and 1,3,5-trimethoxybenzene internal standard. ....        | 8           |
| <b>Figure S7.</b> Table 2, entry 1e - <sup>1</sup> H NMR (C <sub>6</sub> D <sub>5</sub> Br) spectrum of the attempted formal [2+2+2] cycloaddition of 4-methylpent-2-yne and Cp* <sub>2</sub> ZrPh <sub>2</sub> with TiI <sub>4</sub> (THF) <sub>2</sub> (1 mol %), Zn <sup>0</sup> (1 mol %), and 1,3,5-trimethoxybenzene internal standard.....      | 9           |
| <b>Figure S8.</b> Table 2, entry 1f - <sup>1</sup> H NMR (C <sub>6</sub> D <sub>5</sub> Br) spectrum of the attempted formal [2+2+2] cycloaddition of phenyl propyne and Cp* <sub>2</sub> ZrPh <sub>2</sub> with TiI <sub>4</sub> (THF) <sub>2</sub> (1 mol %), Zn <sup>0</sup> (1 mol %), and 1,3,5-trimethoxybenzene internal standard. ....         | 10          |
| <b>Figure S9.</b> Table 2, entry 1g - <sup>1</sup> H NMR (C <sub>6</sub> D <sub>5</sub> Br) spectrum of the cyclotrimerization of phenyl hexyne and Cp* <sub>2</sub> ZrPh <sub>2</sub> with TiI <sub>4</sub> (THF) <sub>2</sub> (1 mol %), Zn <sup>0</sup> (1 mol %), and 1,3,5-trimethoxybenzene internal standard.....                               | 11          |
| <b>Figure S10.</b> Table 2, entry 1g - Quantitative GC-FID spectrum of the formal [2+2+2] cycloaddition of phenyl hexyne and Cp* <sub>2</sub> ZrPh <sub>2</sub> with TiI <sub>4</sub> (THF) <sub>2</sub> (1 mol %), Zn <sup>0</sup> (1 mol %), and 1,3,5-trimethoxybenzene internal standard. ....                                                     | 12          |

|                                                                                                                                                                                                                                                                                                                               |    |
|-------------------------------------------------------------------------------------------------------------------------------------------------------------------------------------------------------------------------------------------------------------------------------------------------------------------------------|----|
| <b>Figure S11.</b> Table 2, entry 1h - Quantitative GC-FID spectrum of the formal [2+2+2] cycloaddition of diphenylacetylene and Cp* <sub>2</sub> ZrPh <sub>2</sub> with TiI <sub>4</sub> (THF) <sub>2</sub> (1 mol %), Zn <sup>0</sup> (1 mol %), and 1,3,5-trimethoxybenzene internal standard.....                         | 13 |
| <b>Figure S12.</b> Table 2, entry 1i - Quantitative GC-FID spectrum of the formal [2+2+2] cycloaddition of bis(4-trifluoromethylphenyl)ethyne and Cp* <sub>2</sub> ZrPh <sub>2</sub> with TiI <sub>4</sub> (THF) <sub>2</sub> (1 mol %), Zn <sup>0</sup> (1 mol %), and 1,3,5-trimethoxybenzene internal standard.....        | 14 |
| <b>Figure S13.</b> Table 2, entry 1j - Quantitative GC-FID spectrum of the formal [2+2+2] cycloaddition of bis(4-methoxyphenyl)ethyne and Cp* <sub>2</sub> ZrPh <sub>2</sub> with TiI <sub>4</sub> (THF) <sub>2</sub> (1 mol %), Zn <sup>0</sup> (1 mol %), and 1,3,5-trimethoxybenzene internal standard.....                | 15 |
| <b>Figure S14.</b> Table 2, entry 1k - Quantitative GC-FID spectrum of the formal [2+2+2] cycloaddition of bis(4-( <i>tert</i> -butyl)phenyl)ethyne and Cp* <sub>2</sub> ZrPh <sub>2</sub> with TiI <sub>4</sub> (THF) <sub>2</sub> (1 mol %), Zn <sup>0</sup> (1 mol %), and 1,3,5-trimethoxybenzene internal standard. .... | 16 |
| <b>Figure S15.</b> Table 2, entry 1l - Quantitative GC-FID spectrum of the formal [2+2+2] cycloaddition of trimethyl(phenylethynyl)silane and Cp* <sub>2</sub> ZrPh <sub>2</sub> with TiI <sub>4</sub> (THF) <sub>2</sub> (1 mol %), Zn <sup>0</sup> (1 mol %), and 1,3,5-trimethoxybenzene internal standard. ....           | 17 |
| <b>Figure S16.</b> Table 2, entry 1m - Quantitative GC-FID spectrum of the formal [2+2+2] cycloaddition of trimethyl( <i>n</i> -butylethynyl)silane and Cp* <sub>2</sub> ZrPh <sub>2</sub> with TiI <sub>4</sub> (THF) <sub>2</sub> (1 mol %), Zn <sup>0</sup> (1 mol %), and 1,3,5-trimethoxybenzene internal standard. .... | 18 |
| <b>Figure S17.</b> <sup>1</sup> H NMR spectrum (CDCl <sub>3</sub> ) of <b>8</b> . ....                                                                                                                                                                                                                                        | 19 |
| <b>Figure S18.</b> <sup>13</sup> C{ <sup>1</sup> H} NMR spectrum (CDCl <sub>3</sub> ) of <b>8</b> . ....                                                                                                                                                                                                                      | 20 |
| <b>Figure S19.</b> Quantitative GC-FID spectrum of the formal [2+2+2] cycloaddition of diphenylacetylene and <b>8</b> with TiI <sub>4</sub> (THF) <sub>2</sub> (1 mol %), Zn <sup>0</sup> (1 mol %) and 1,3,5-trimethoxybenzene internal standard.....                                                                        | 21 |
| <b>Figure S20.</b> Alkyne “composite A-values” vs total yield of naphthalene products formed during the formal [2+2+2] cycloaddition of an alkyne and Cp* <sub>2</sub> ZrPh <sub>2</sub> with TiI <sub>4</sub> (THF) <sub>2</sub> (1 mol %) and Zn <sup>0</sup> (1 mol %). ....                                               | 22 |
| <b>Figure S21.</b> <sup>1</sup> H NMR spectrum (C <sub>6</sub> D <sub>5</sub> Br) of the thermolysis of <b>8</b> after 1 h. ....                                                                                                                                                                                              | 23 |
| <b>Figure S22.</b> <sup>1</sup> H NMR spectrum (CDCl <sub>3</sub> ) of <b>7a</b> . ....                                                                                                                                                                                                                                       | 24 |
| <b>Figure S23.</b> <sup>13</sup> C{ <sup>1</sup> H} NMR spectrum (CDCl <sub>3</sub> ) of <b>7a</b> . ....                                                                                                                                                                                                                     | 25 |
| <b>Figure S24.</b> <sup>1</sup> H NMR spectrum (CDCl <sub>3</sub> ) of <b>7b</b> . ....                                                                                                                                                                                                                                       | 26 |
| <b>Figure S25.</b> <sup>13</sup> C{ <sup>1</sup> H} NMR spectrum (CDCl <sub>3</sub> ) of <b>7b</b> . ....                                                                                                                                                                                                                     | 27 |
| <b>Figure S26.</b> <sup>1</sup> H NMR spectrum (CDCl <sub>3</sub> ) of <b>7c</b> . ....                                                                                                                                                                                                                                       | 28 |
| <b>Figure S27.</b> <sup>13</sup> C{ <sup>1</sup> H} NMR spectrum (CDCl <sub>3</sub> ) of <b>7c</b> . ....                                                                                                                                                                                                                     | 29 |
| <b>Figure S28.</b> <sup>1</sup> H NMR spectrum (CDCl <sub>3</sub> ) of <b>7d</b> . ....                                                                                                                                                                                                                                       | 30 |
| <b>Figure S29.</b> <sup>13</sup> C{ <sup>1</sup> H} NMR spectrum (CDCl <sub>3</sub> ) of <b>7d</b> . ....                                                                                                                                                                                                                     | 31 |
| <b>Figure S30.</b> <sup>1</sup> H NMR spectrum (CDCl <sub>3</sub> ) of <b>7e</b> . ....                                                                                                                                                                                                                                       | 32 |
| <b>Figure S31.</b> <sup>13</sup> C{ <sup>1</sup> H} NMR spectrum (CDCl <sub>3</sub> ) of <b>7e</b> . ....                                                                                                                                                                                                                     | 33 |
| <b>Figure S32.</b> <sup>1</sup> H NMR spectrum (CDCl <sub>3</sub> ) of <b>7f</b> . ....                                                                                                                                                                                                                                       | 34 |
| <b>Figure S33.</b> <sup>13</sup> C{ <sup>1</sup> H} NMR spectrum (CDCl <sub>3</sub> ) of <b>7f</b> . ....                                                                                                                                                                                                                     | 35 |

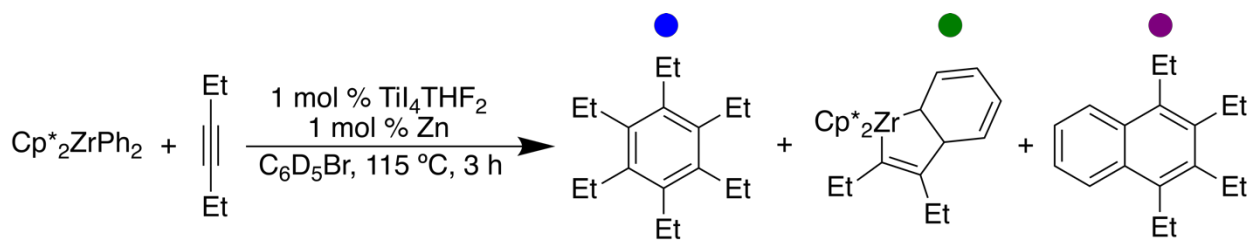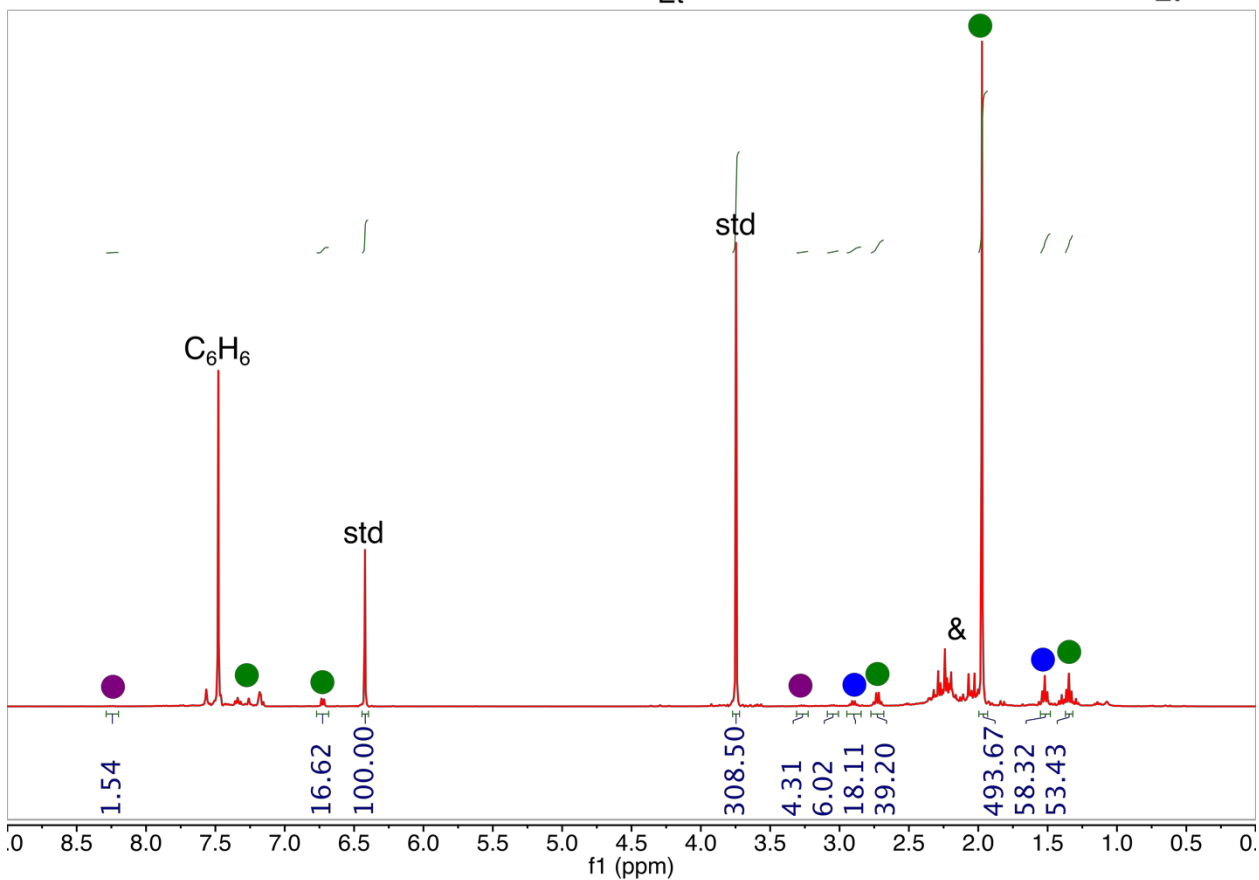

std = trimethoxybenzene  
 & = " $\text{Cp}^*_2\text{Zr}$ "

**Figure S1.** Table 2, entry 1a -  $^1\text{H}$  NMR ( $\text{C}_6\text{D}_5\text{Br}$ ) spectrum of the attempted formal [2+2+2] cycloaddition of 3-hexyne and  $\text{Cp}^*_2\text{ZrPh}_2$  with  $\text{TiI}_4(\text{THF})_2$  (1 mol %),  $\text{Zn}^0$  (1 mol %), and 1,3,5-trimethoxybenzene internal standard.

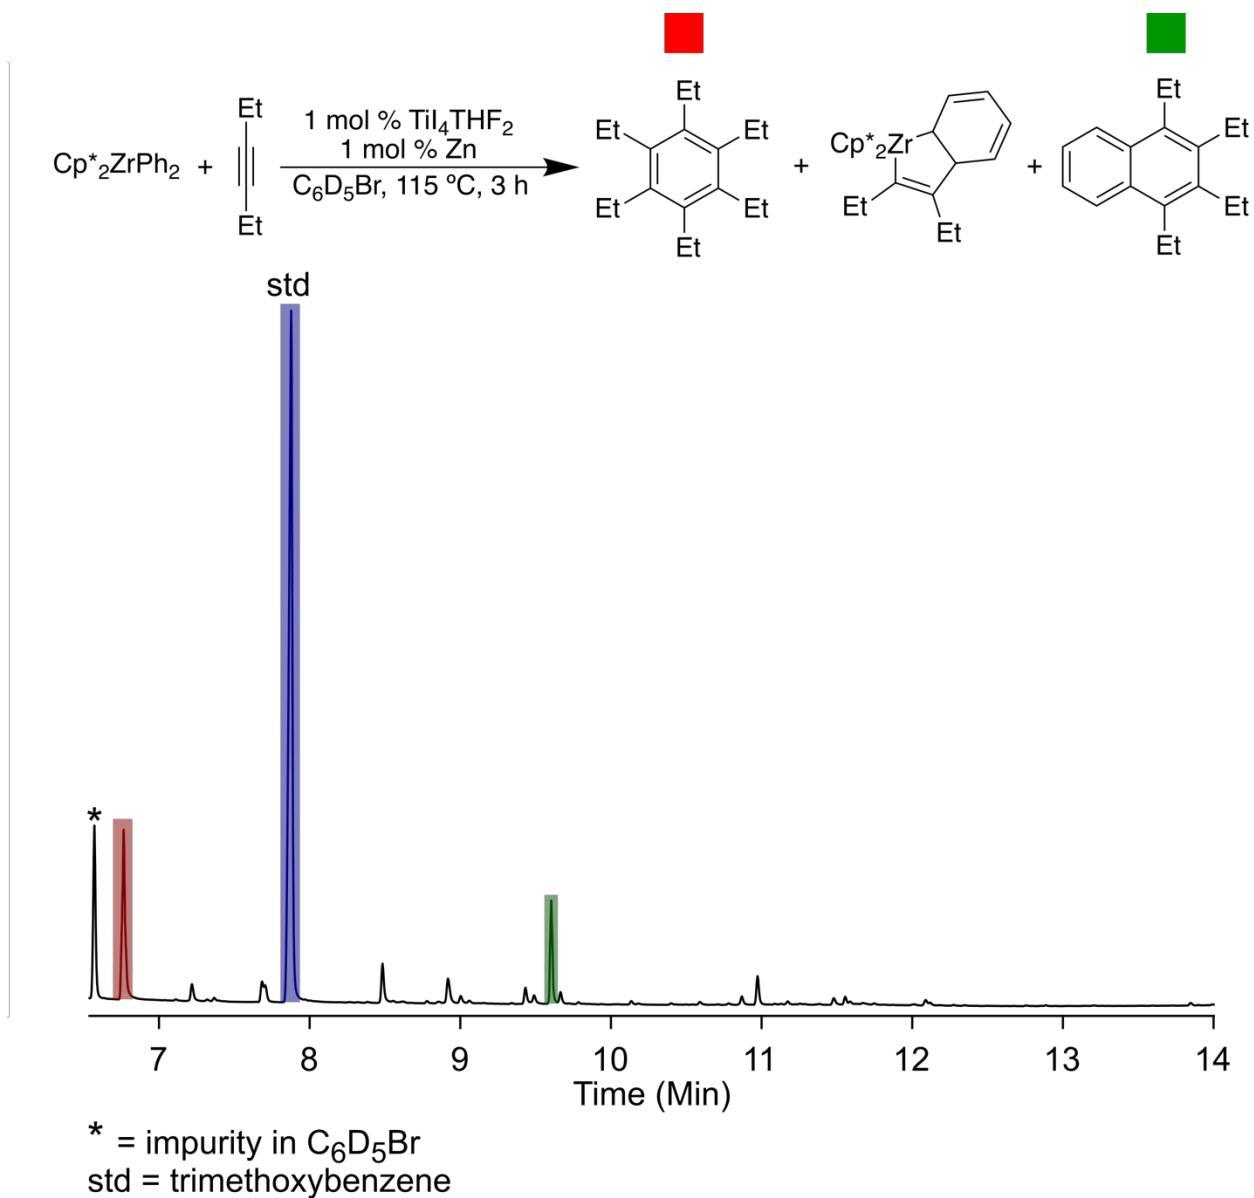

| Product           | Retention time (min) | Peak area (a.u.) | Carbon # | Yield (%) |
|-------------------|----------------------|------------------|----------|-----------|
| trimer            | 6.571                | 128.5            | 18       | 8         |
| trimethoxybenzene | 7.869                | 2290.7           | 9        | N/A       |
| naphthalene       | 9.604                | 120.5            | 18       | 5         |

**Figure S2.** Table 2, entry 1a - Quantitative GC-FID spectrum of the attempted formal [2+2+2] cycloaddition of 3-hexyne and  $\text{Cp}^*_2\text{ZrPh}_2$  with  $\text{TiI}_4(\text{THF})_2$  (1 mol %),  $\text{Zn}^0$  (1 mol %), and 1,3,5-trimethoxybenzene internal standard.

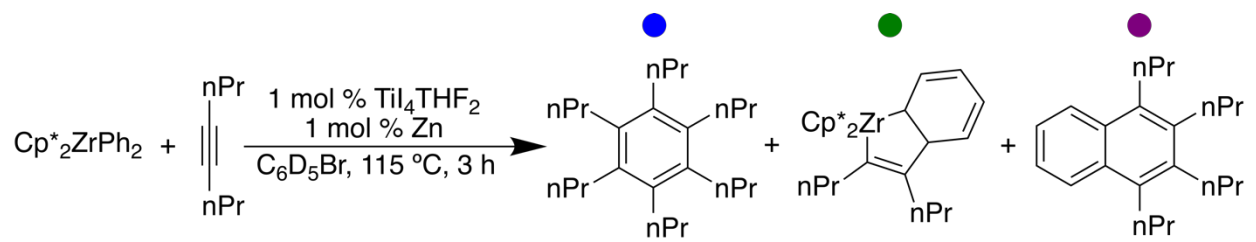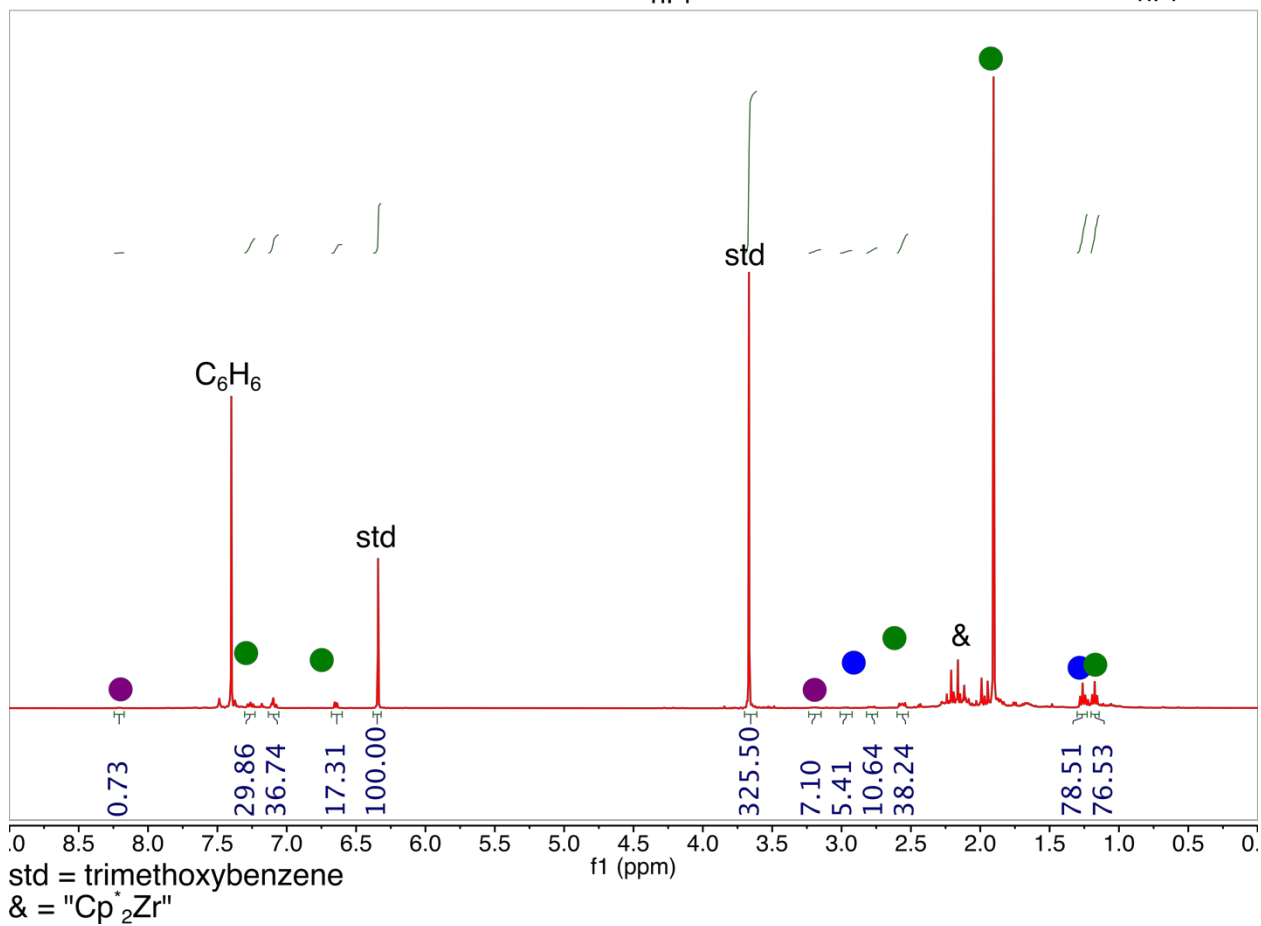

**Figure S3.** Table 2, entry 1b - <sup>1</sup>H NMR (C<sub>6</sub>D<sub>5</sub>Br) spectrum of the attempted formal [2+2+2] cycloaddition of 4-octyne and Cp\*<sub>2</sub>ZrPh<sub>2</sub> with TiI<sub>4</sub>(THF)<sub>2</sub> (1 mol %), Zn<sup>0</sup> (1 mol %), and 1,3,5-trimethoxybenzene internal standard.

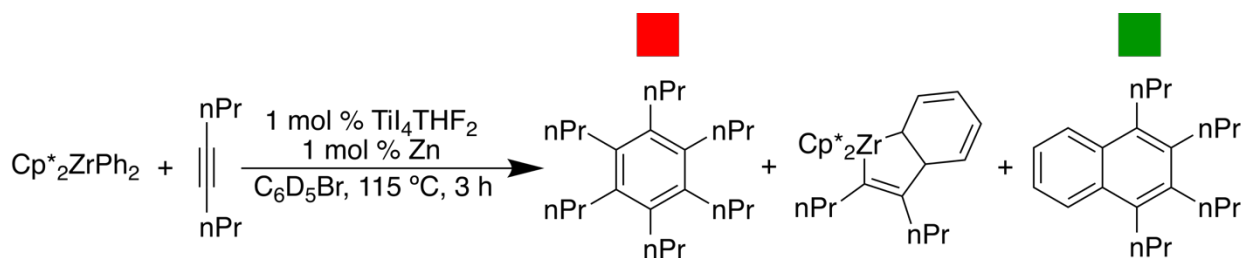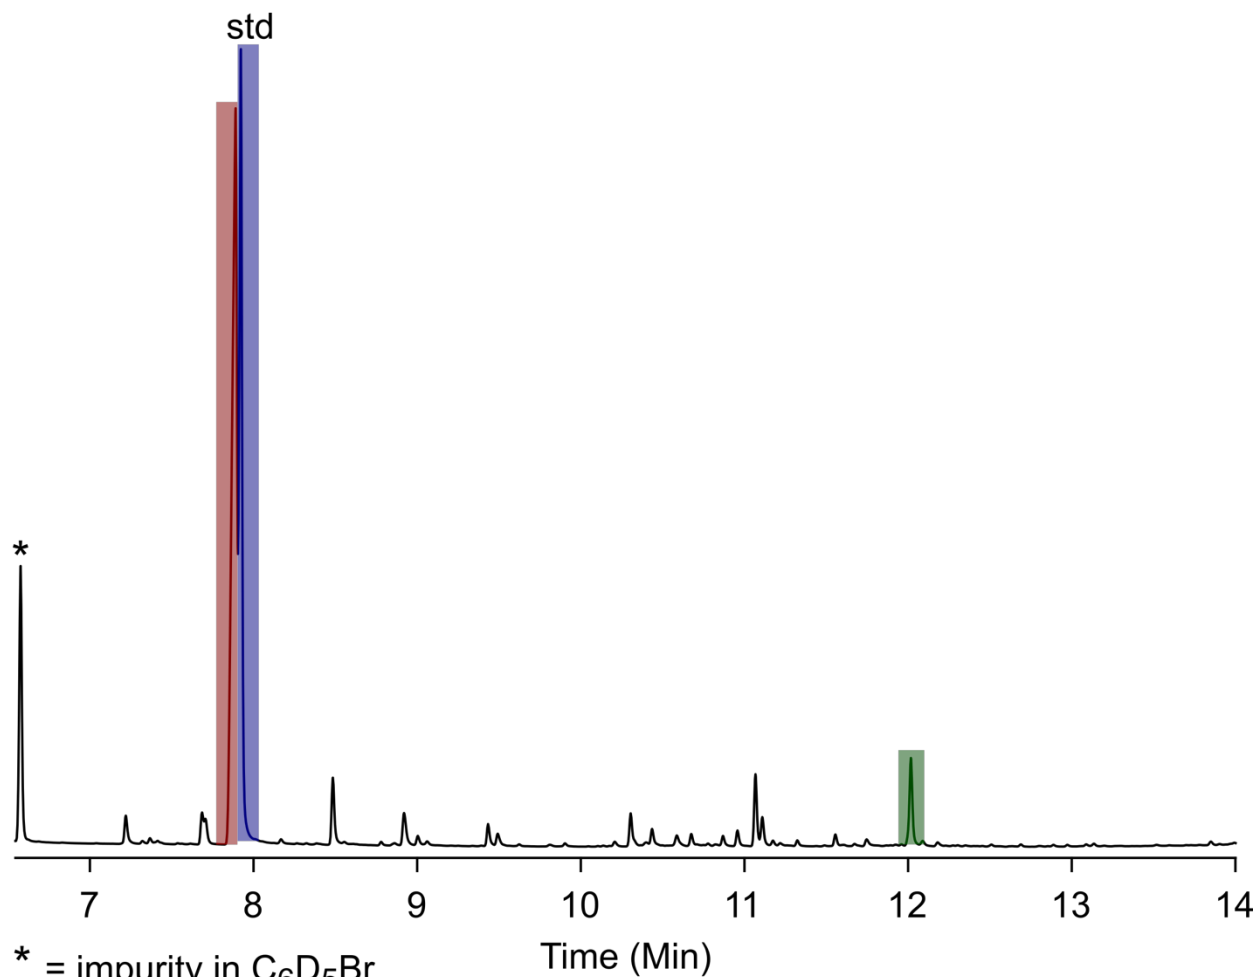

\* = impurity in C<sub>6</sub>D<sub>5</sub>Br  
 std = trimethoxybenzene

| Product           | Retention time (min) | Peak area (a.u.) | Carbon # | Yield (%) |
|-------------------|----------------------|------------------|----------|-----------|
| trimer            | 7.890                | 240.2            | 24       | 9         |
| trimethoxybenzene | 7.869                | 2868.3           | 9        | N/A       |
| naphthalene       | 12.017               | 150.8            | 22       | 4         |

**Figure S4.** Table 2, entry 1b - Quantitative GC-FID spectrum of the attempted formal [2+2+2] cycloaddition of 4-octyne and Cp\*<sub>2</sub>ZrPh<sub>2</sub> with TiI<sub>4</sub>(THF)<sub>2</sub> (1 mol %), Zn<sup>0</sup> (1 mol %), and 1,3,5-trimethoxybenzene internal standard.

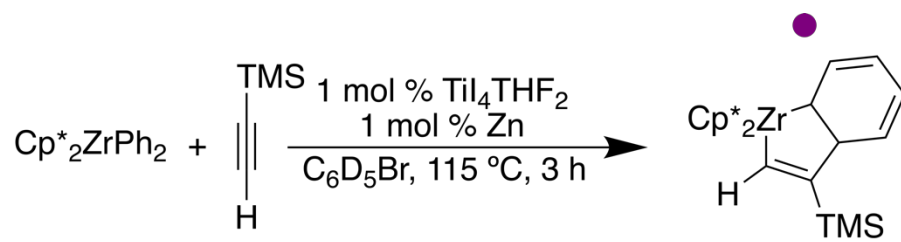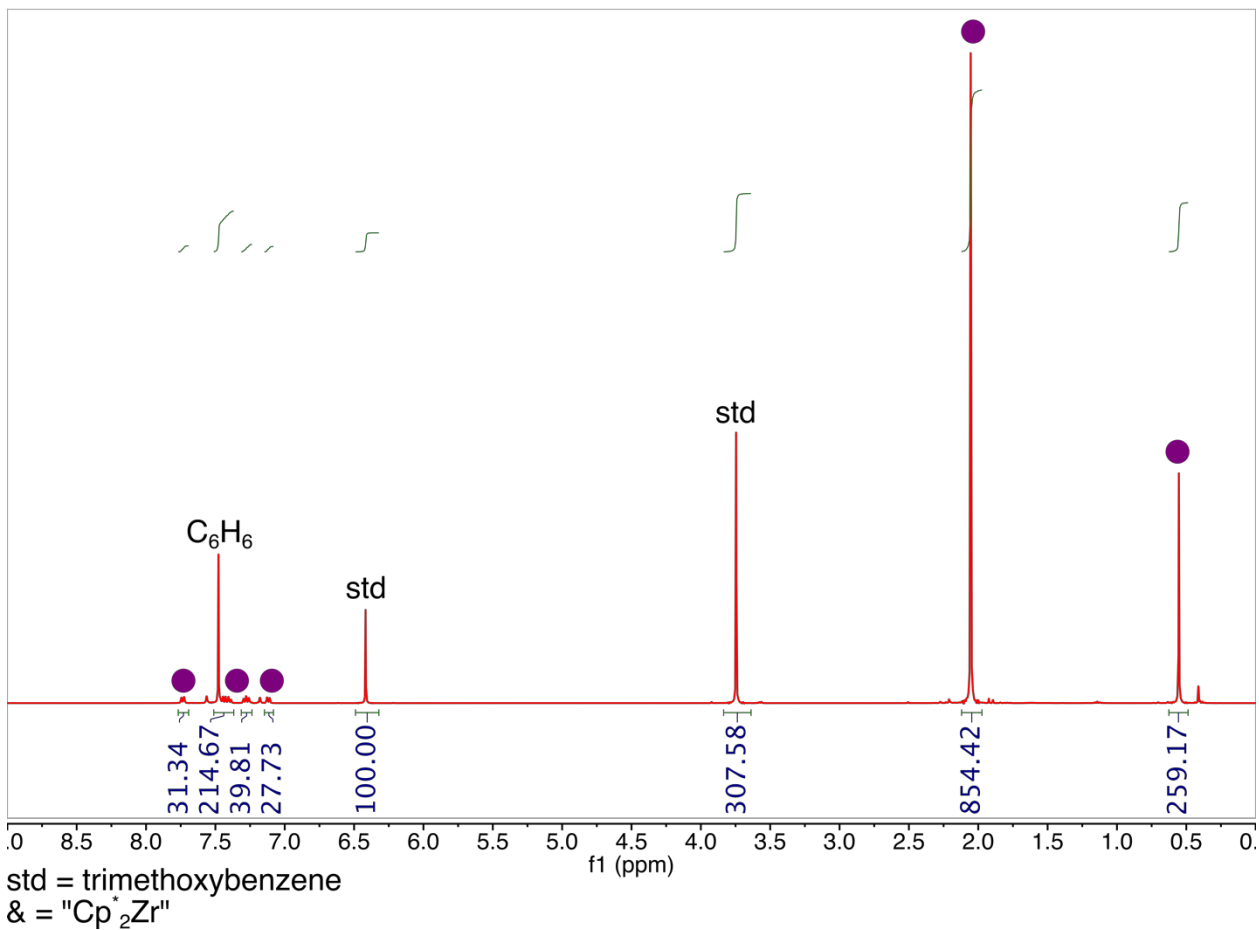

**Figure S5.** Table 2, entry 1c - <sup>1</sup>H NMR (C<sub>6</sub>D<sub>5</sub>Br) spectrum of the attempted formal [2+2+2] cycloaddition of trimethylsilylacetylene and Cp\*<sub>2</sub>ZrPh<sub>2</sub> with TiI<sub>4</sub>(THF)<sub>2</sub> (1 mol %), Zn<sup>0</sup> (1 mol %), and 1,3,5-trimethoxybenzene internal standard.

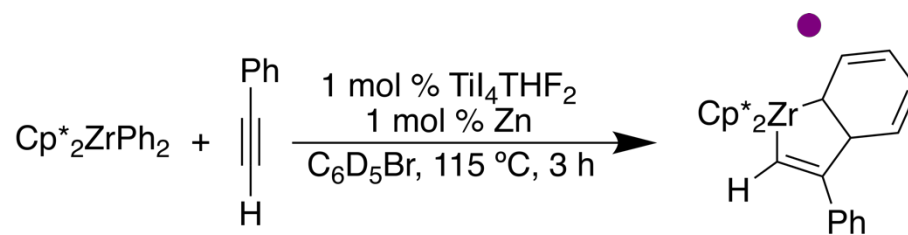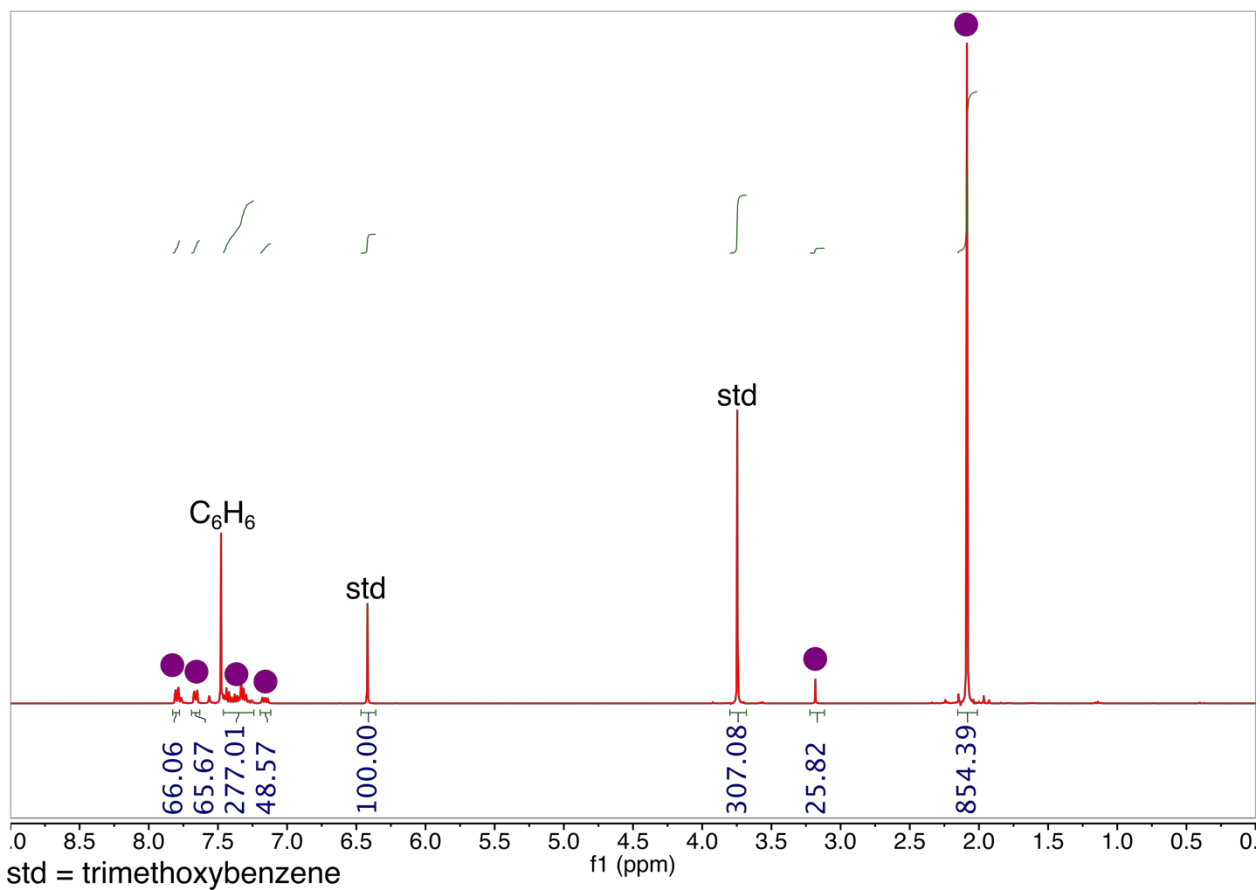

**Figure S6.** Table 2, entry 1d -  $^1\text{H}$  NMR ( $\text{C}_6\text{D}_5\text{Br}$ ) spectrum of the attempted formal [2+2+2] cycloaddition of phenylacetylene and  $\text{Cp}^*_2\text{ZrPh}_2$  with  $\text{TiI}_4(\text{THF})_2$  (1 mol %),  $\text{Zn}^0$  (1 mol %), and 1,3,5-trimethoxybenzene internal standard.



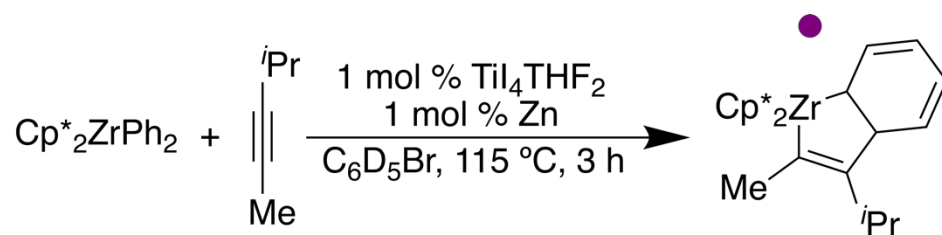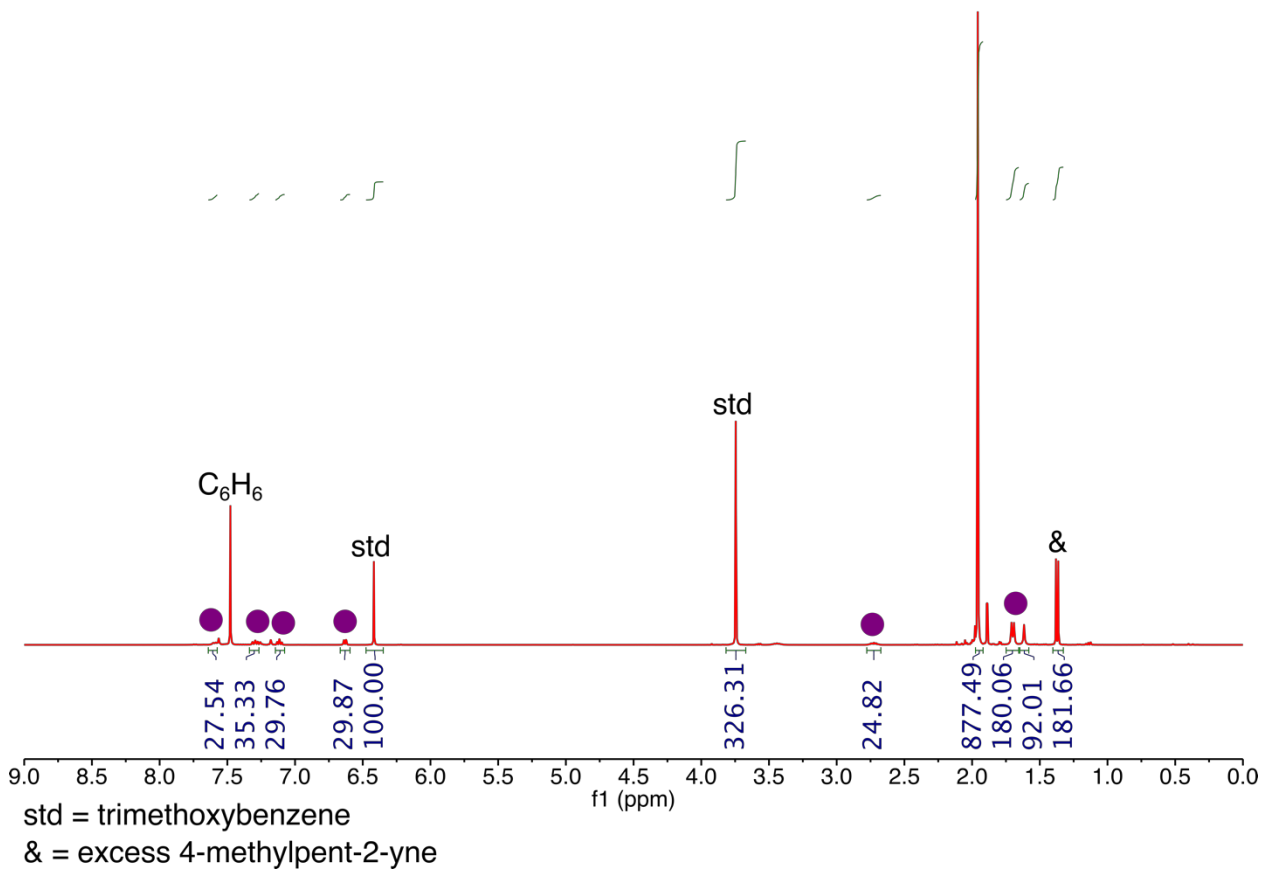

**Figure S7.** Table 2, entry 1e - <sup>1</sup>H NMR (C<sub>6</sub>D<sub>5</sub>Br) spectrum of the attempted formal [2+2+2] cycloaddition of 4-methylpent-2-yne and Cp<sup>\*</sup><sub>2</sub>ZrPh<sub>2</sub> with TiI<sub>4</sub>(THF)<sub>2</sub> (1 mol %), Zn<sup>0</sup> (1 mol %), and 1,3,5-trimethoxybenzene internal standard.

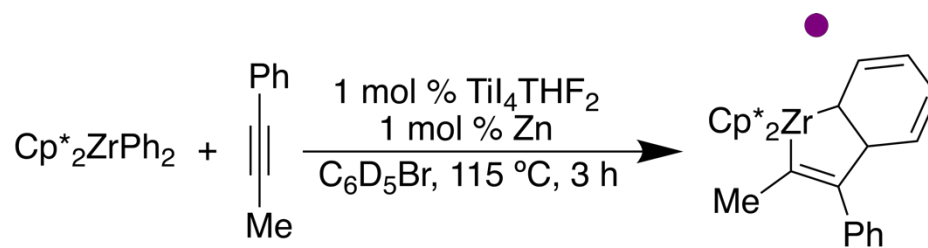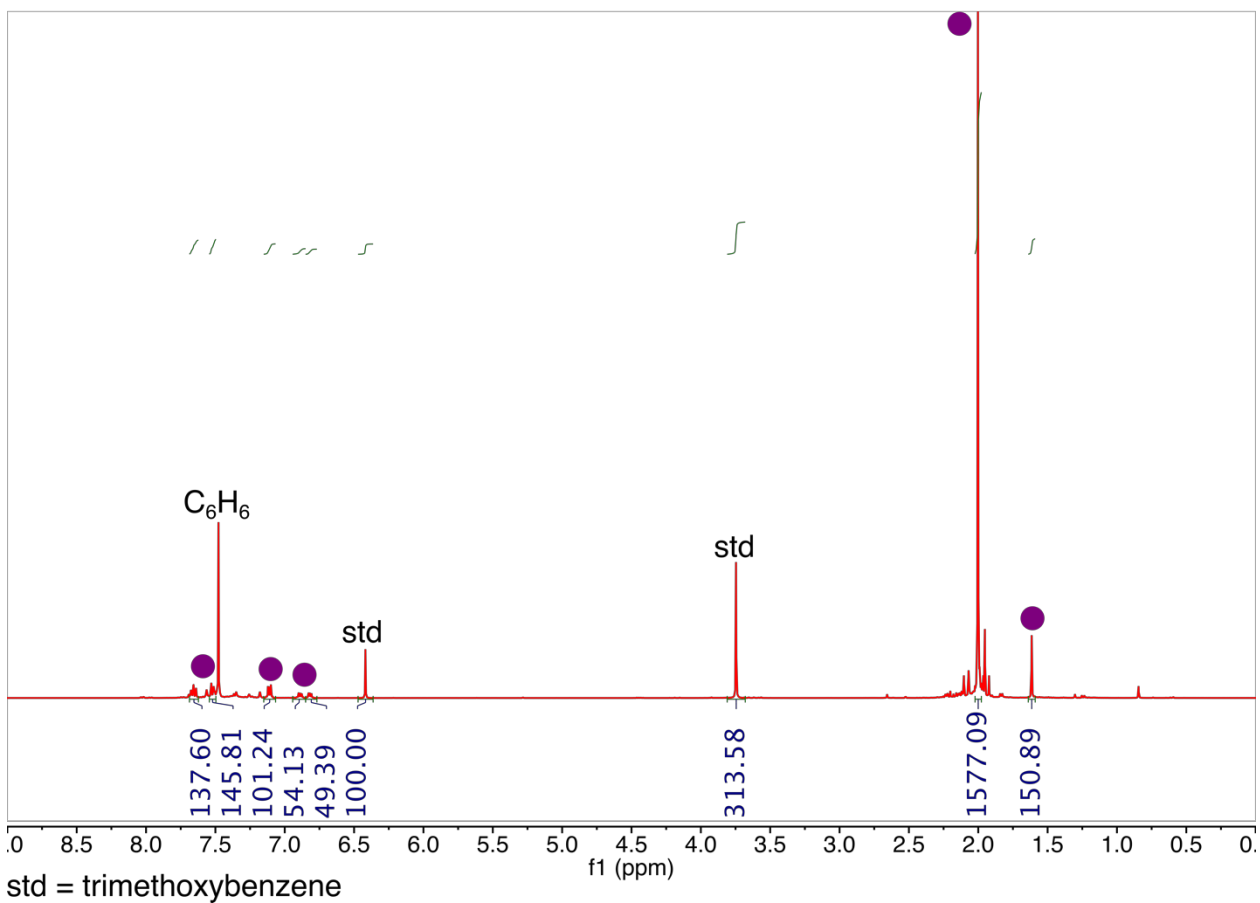

**Figure S8.** Table 2, entry 1f - <sup>1</sup>H NMR (C<sub>6</sub>D<sub>5</sub>Br) spectrum of the attempted formal [2+2+2] cycloaddition of phenyl propyne and Cp<sup>\*</sup><sub>2</sub>ZrPh<sub>2</sub> with TiI<sub>4</sub>(THF)<sub>2</sub> (1 mol %), Zn<sup>0</sup> (1 mol %), and 1,3,5-trimethoxybenzene internal standard.

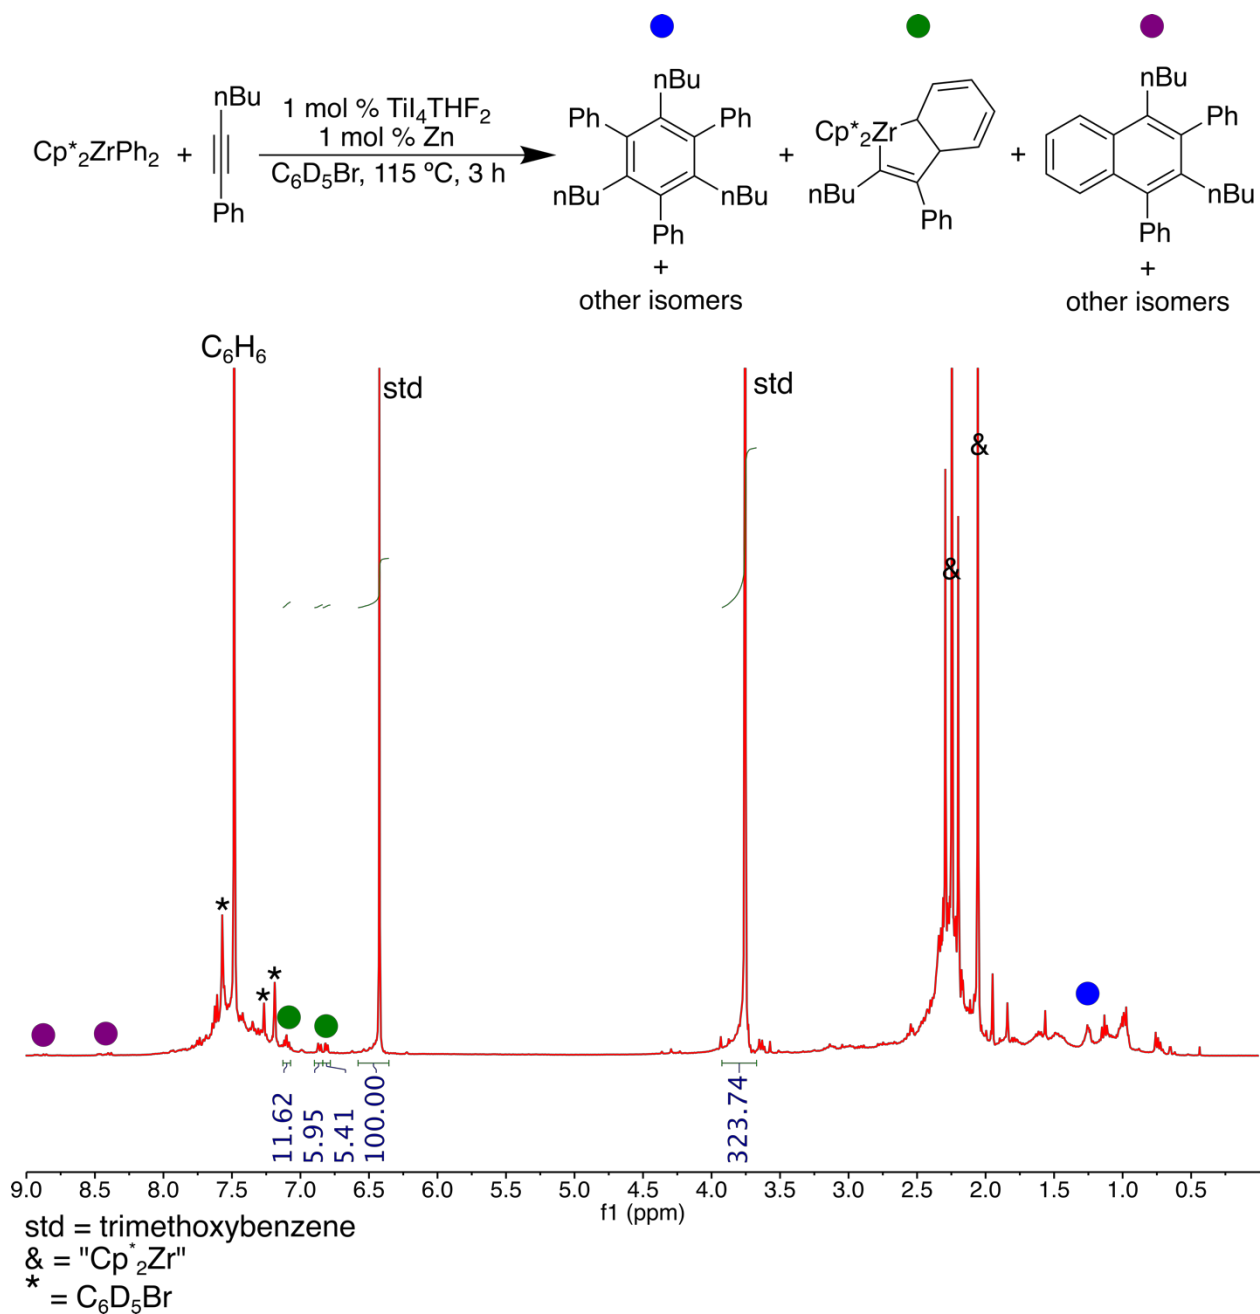

**Figure S9.** Table 2, entry 1g -  $^1\text{H}$  NMR ( $\text{C}_6\text{D}_5\text{Br}$ ) spectrum of the cyclotrimerization of phenyl hexyne and  $\text{Cp}^*_2\text{ZrPh}_2$  with  $\text{TiI}_4(\text{THF})_2$  (1 mol %),  $\text{Zn}^0$  (1 mol %), and 1,3,5-trimethoxybenzene internal standard.

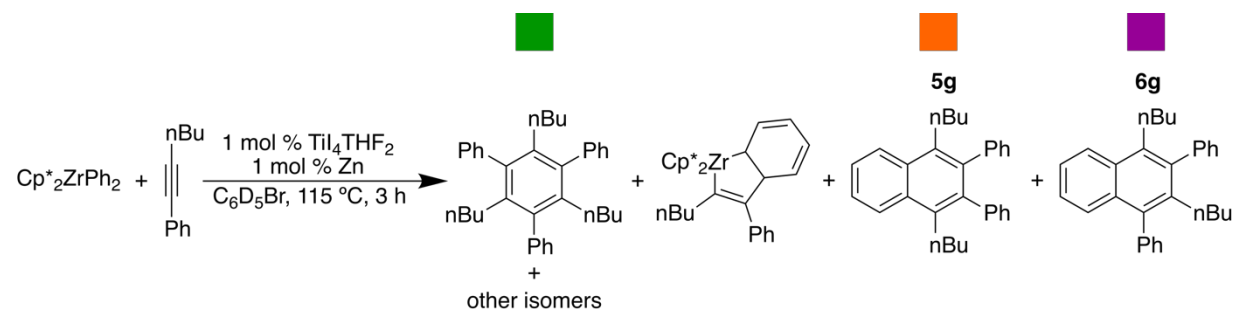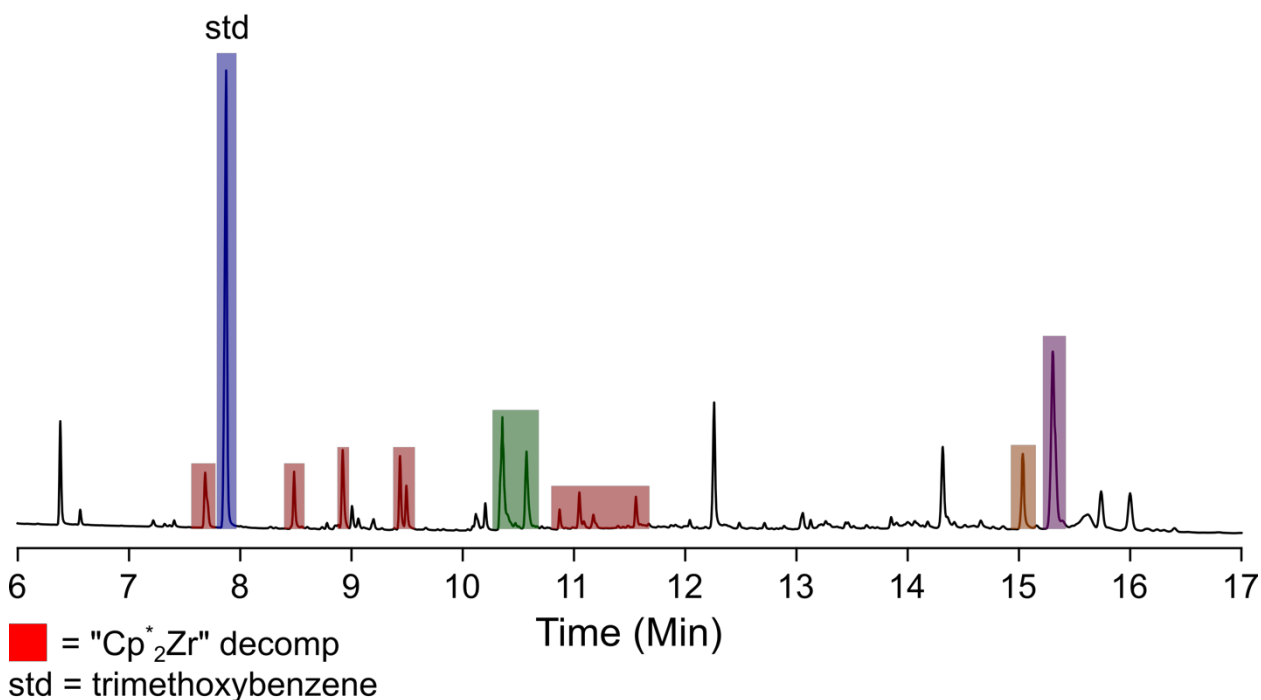

| Product              | Retention time (min) | Peak area (a.u.) | Carbon # | Yield (%) |
|----------------------|----------------------|------------------|----------|-----------|
| trimethoxybenzene    | 7.869                | 2632.5           | 9        | N/A       |
| trimer 1             | 10.350               | 353.4            | 36       | 10        |
| trimer 2             | 10.588               | 207.3            | 36       | 6         |
| naphthalene <b>5</b> | 15.020               | 179.2            | 30       | 4         |
| naphthalene <b>6</b> | 15.320               | 435.6            | 30       | 10        |

**Figure S10.** Table 2, entry 1g - Quantitative GC-FID spectrum of the formal [2+2+2] cycloaddition of phenyl hexyne and  $\text{Cp}^*_2\text{ZrPh}_2$  with  $\text{TiI}_4(\text{THF})_2$  (1 mol %),  $\text{Zn}^0$  (1 mol %), and 1,3,5-trimethoxybenzene internal standard.

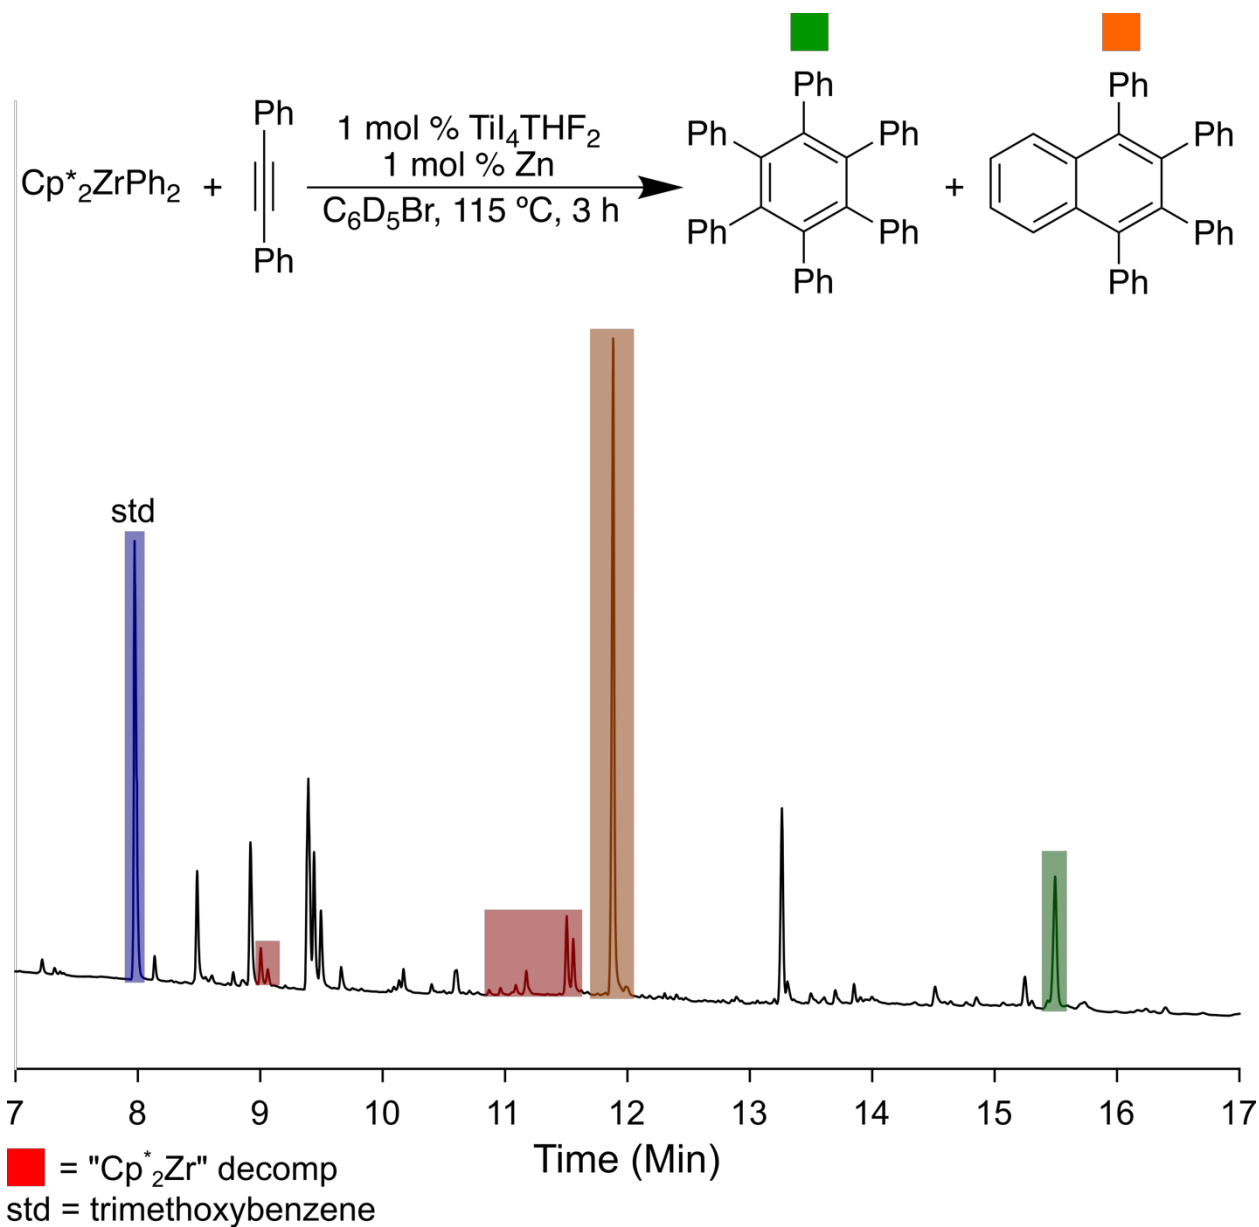

| Product           | Retention time (min) | Peak area (a.u.) | Carbon # | Yield (%) |
|-------------------|----------------------|------------------|----------|-----------|
| trimethoxybenzene | 7.869                | 2200.1           | 9        | N/A       |
| naphthalene       | 11.899               | 2965.1           | 34       | 71        |
| trimer            | 15.260               | 818.5            | 42       | 24        |

**Figure S11.** Table 2, entry 1h - Quantitative GC-FID spectrum of the formal [2+2+2] cycloaddition of diphenylacetylene and  $\text{Cp}^*_2\text{ZrPh}_2$  with  $\text{TiI}_4(\text{THF})_2$  (1 mol %),  $\text{Zn}^0$  (1 mol %), and 1,3,5-trimethoxybenzene internal standard.

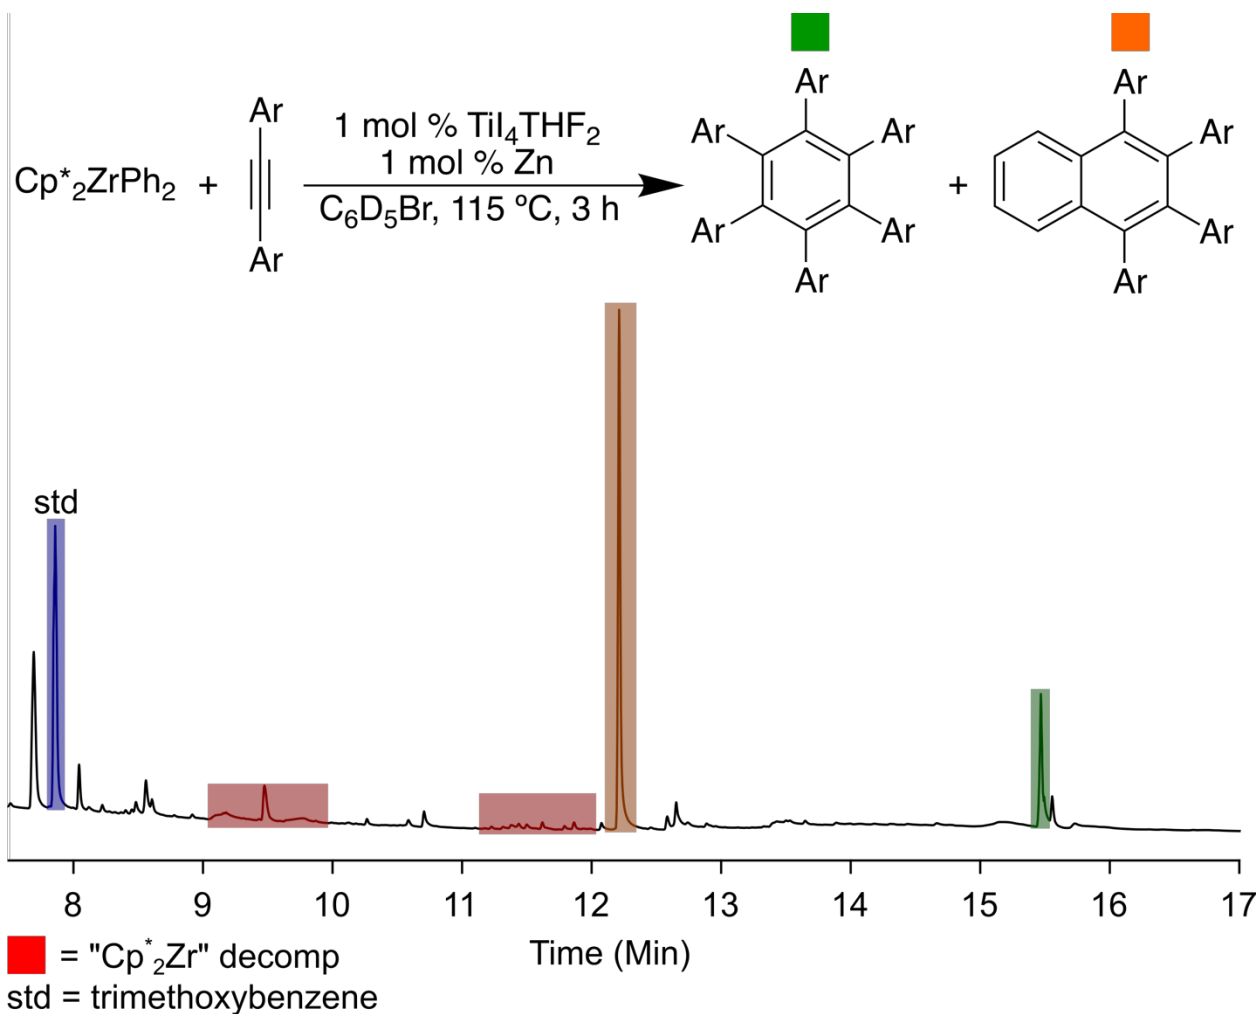

| Product           | Retention time (min) | Peak area (a.u.) | Carbon # | Yield (%) |
|-------------------|----------------------|------------------|----------|-----------|
| trimethoxybenzene | 7.869                | 2317.7           | 9        | N/A       |
| naphthalene       | 12.299               | 3111.0           | 38       | 64        |
| trimer            | 15.571               | 795.4            | 48       | 19        |

**Figure S12.** Table 2, entry 1i - Quantitative GC-FID spectrum of the formal [2+2+2] cycloaddition of bis(4-trifluoromethylphenyl)ethyne and Cp\*<sub>2</sub>ZrPh<sub>2</sub> with TiI<sub>4</sub>(THF)<sub>2</sub> (1 mol %), Zn<sup>0</sup> (1 mol %), and 1,3,5-trimethoxybenzene internal standard.

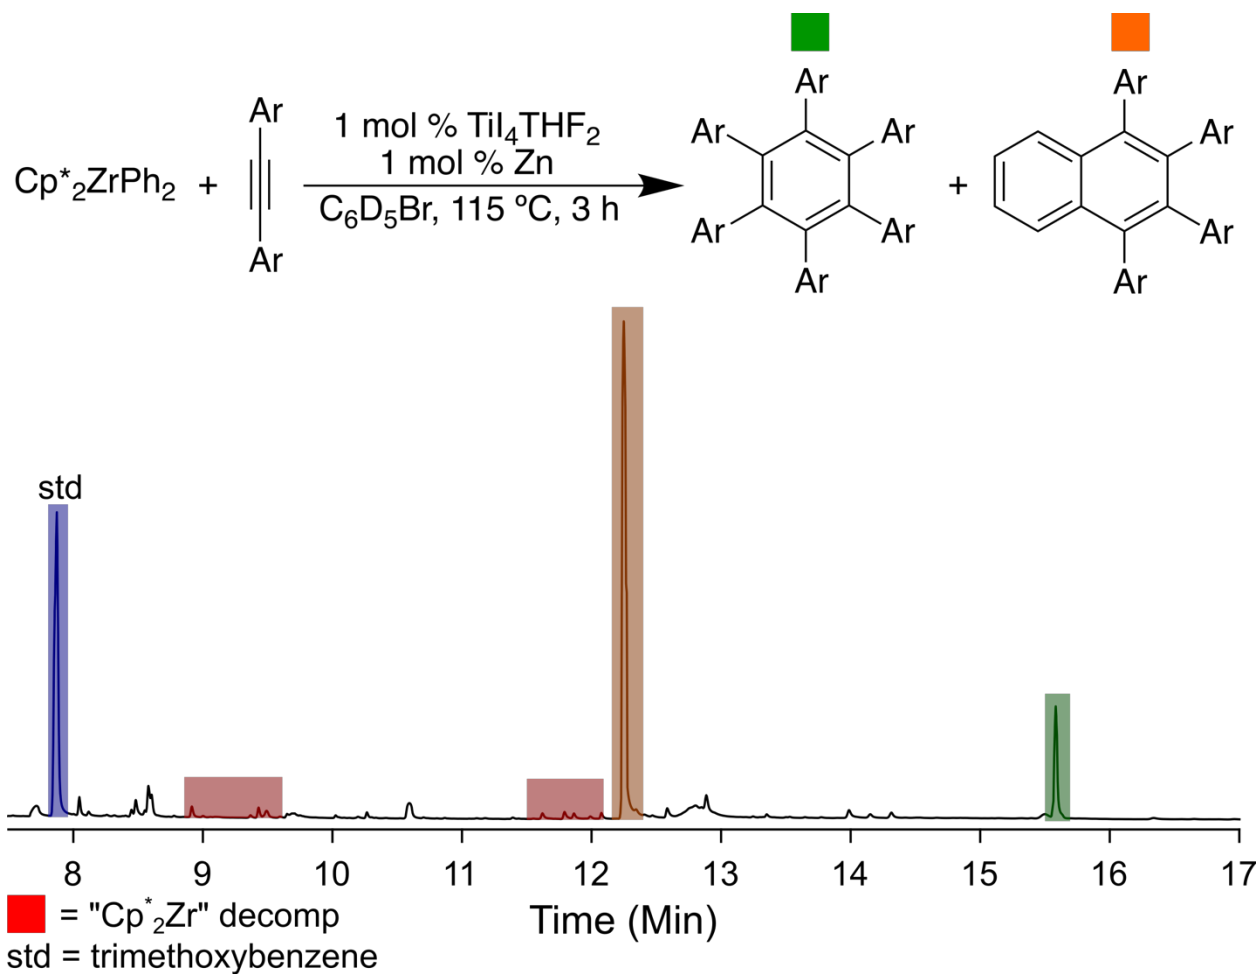

| Product           | Retention time (min) | Peak area (a.u.) | Carbon # | Yield (%) |
|-------------------|----------------------|------------------|----------|-----------|
| trimethoxybenzene | 7.869                | 2261.1           | 9        | N/A       |
| naphthalene       | 12.289               | 3750.4           | 38       | 78        |
| trimer            | 15.560               | 600.4            | 48       | 15        |

**Figure S13.** Table 2, entry 1j - Quantitative GC-FID spectrum of the formal [2+2+2] cycloaddition of bis(4-methoxyphenyl)ethyne and Cp<sup>\*</sup><sub>2</sub>ZrPh<sub>2</sub> with TiI<sub>4</sub>(THF)<sub>2</sub> (1 mol %), Zn<sup>0</sup> (1 mol %), and 1,3,5-trimethoxybenzene internal standard.

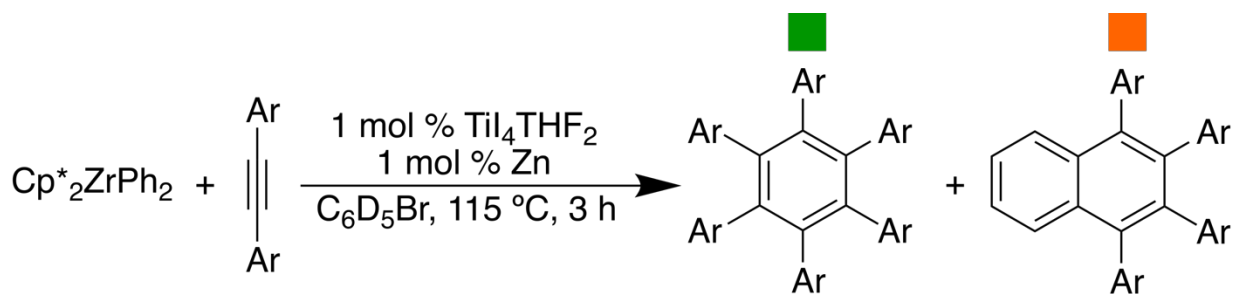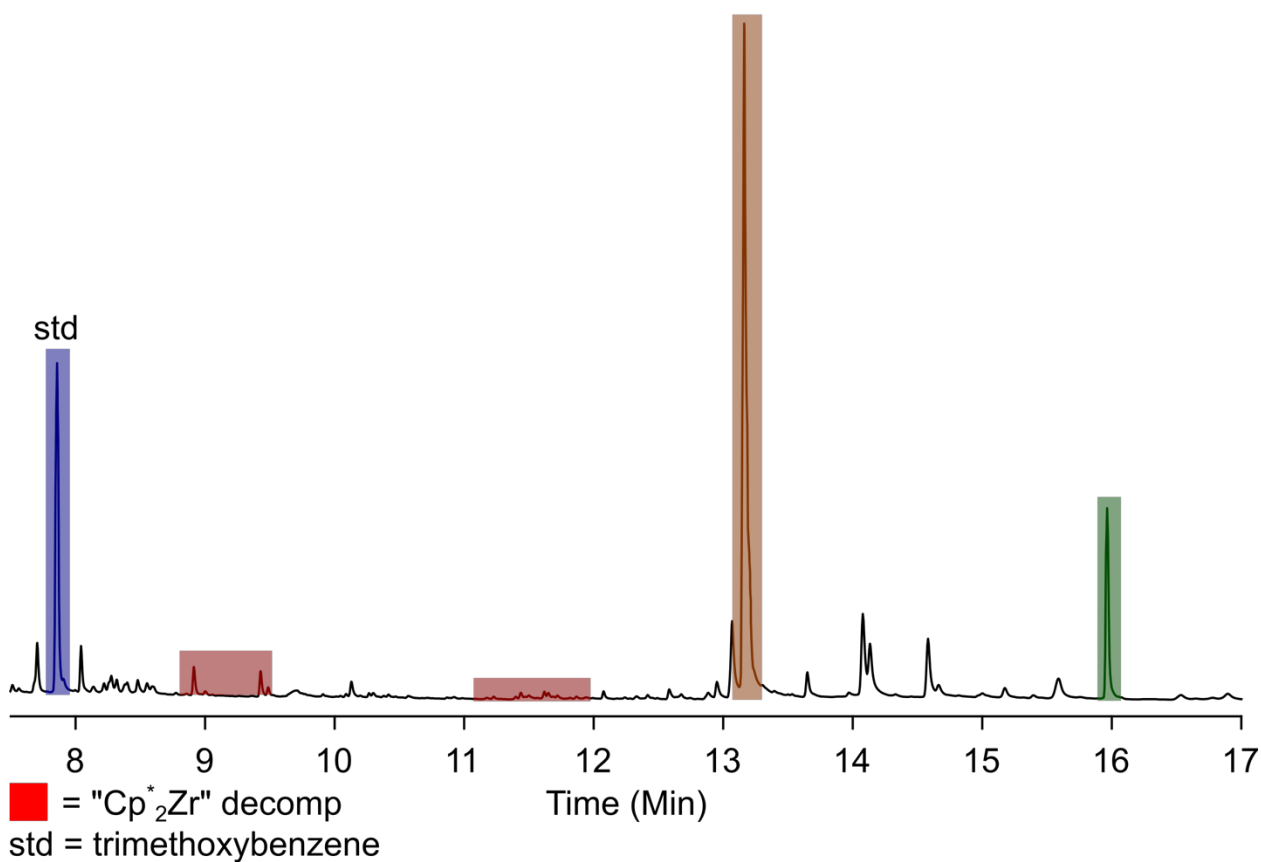

| Product           | Retention time (min) | Peak area (a.u.) | Carbon # | Yield (%) |
|-------------------|----------------------|------------------|----------|-----------|
| trimethoxybenzene | 7.869                | 2495.0           | 9        | N/A       |
| naphthalene       | 13.255               | 5261.2           | 50       | 78        |
| trimer            | 16.040               | 1360.0           | 66       | 15        |

**Figure S14.** Table 2, entry 1k - Quantitative GC-FID spectrum of the formal [2+2+2] cycloaddition of bis(4-(*tert*-butyl)phenyl)ethyne and  $\text{Cp}^*_2\text{ZrPh}_2$  with  $\text{TiI}_4(\text{THF})_2$  (1 mol %),  $\text{Zn}^0$  (1 mol %), and 1,3,5-trimethoxybenzene internal standard.



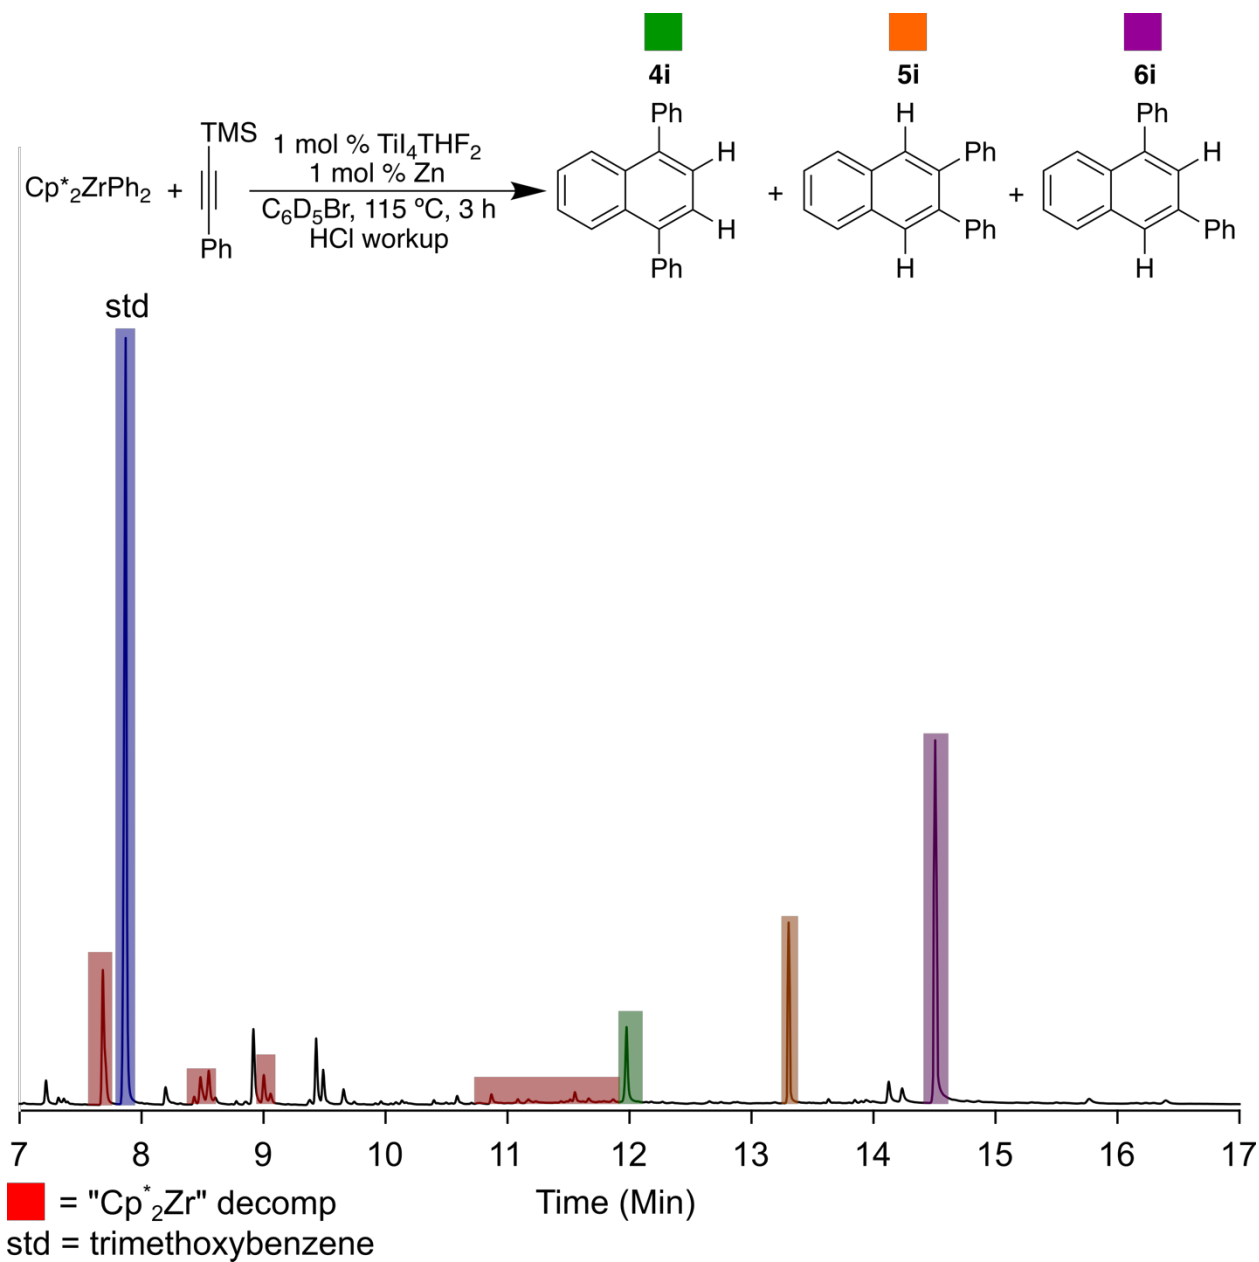

| Product              | Retention time (min) | Peak area (a.u.) | Carbon # | Yield (%) |
|----------------------|----------------------|------------------|----------|-----------|
| trimethoxybenzene    | 7.869                | 1901.5           | 9        | N/A       |
| naphthalene <b>4</b> | 11.981               | 122.5            | 28       | 8         |
| naphthalene <b>5</b> | 13.320               | 412.8            | 28       | 14        |
| naphthalene <b>6</b> | 14.555               | 765.6            | 28       | 26        |

**Figure S15.** Table 2, entry 11 - Quantitative GC-FID spectrum of the formal [2+2+2] cycloaddition of trimethyl(phenylethynyl)silane and  $\text{Cp}^*_2\text{ZrPh}_2$  with  $\text{TiI}_4(\text{THF})_2$  (1 mol %),  $\text{Zn}^0$  (1 mol %), and 1,3,5-trimethoxybenzene internal standard.

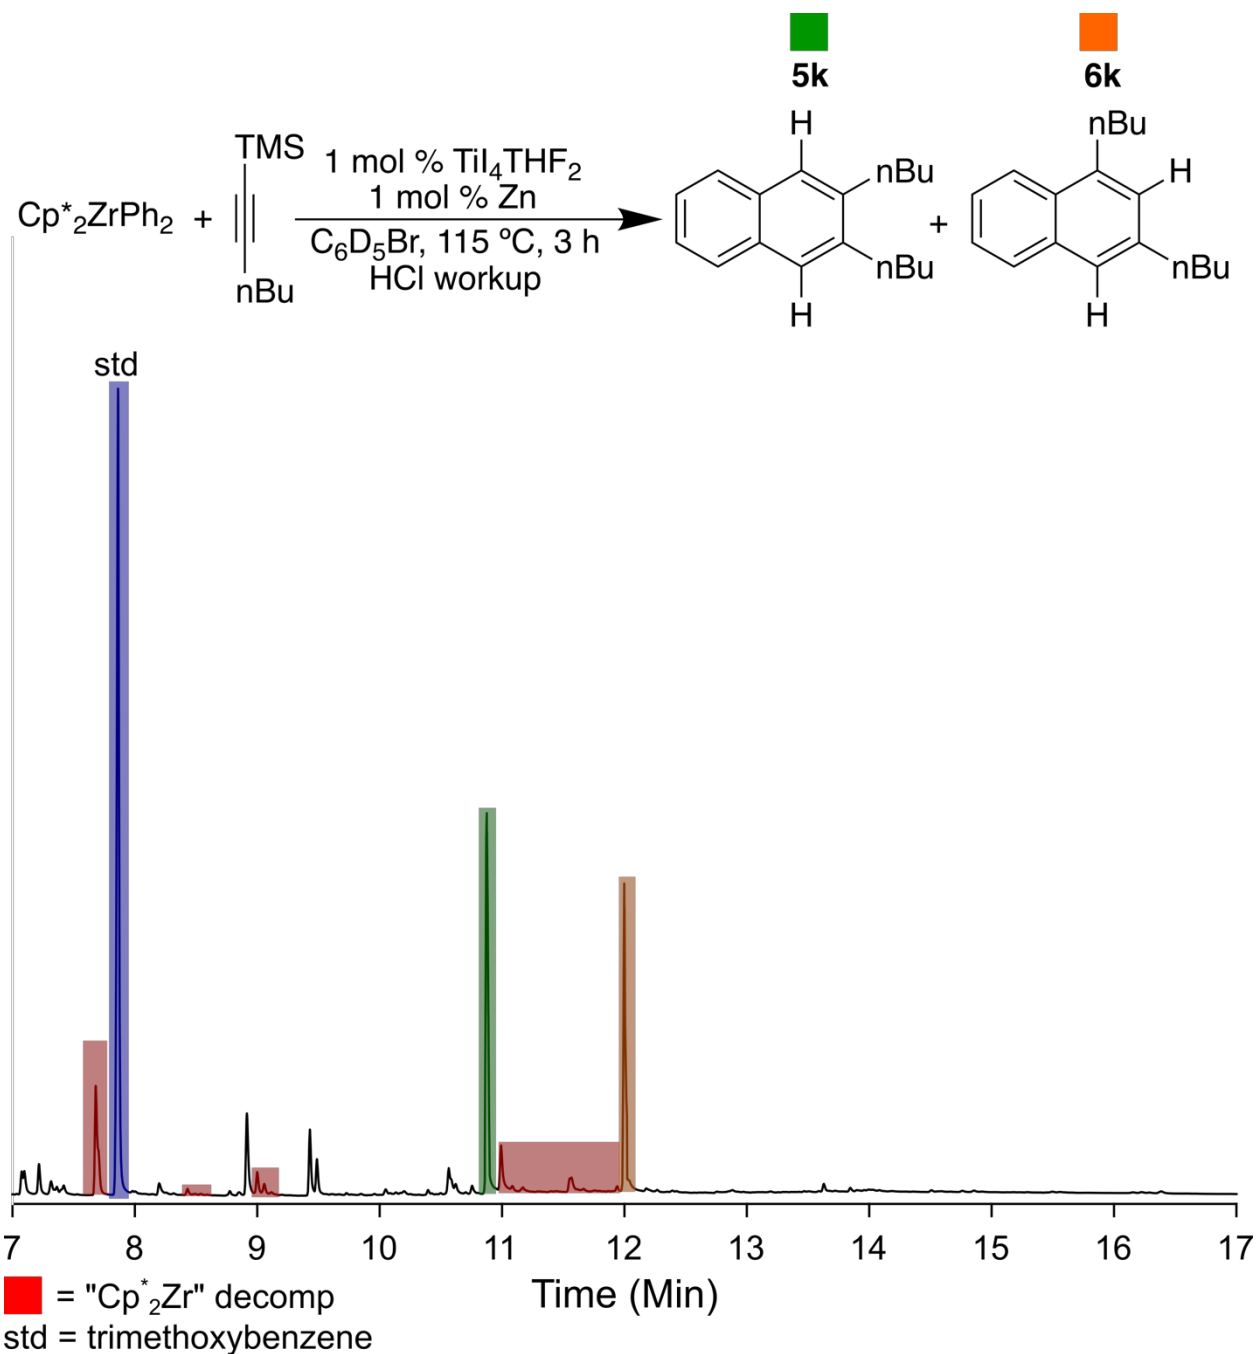

| Product              | Retention time (min) | Peak area (a.u.) | Carbon # | Yield (%) |
|----------------------|----------------------|------------------|----------|-----------|
| trimethoxybenzene    | 7.869                | 2239.0           | 9        | N/A       |
| naphthalene <b>5</b> | 10.888               | 1002.7           | 24       | 34        |
| naphthalene <b>6</b> | 12.055               | 897.8            | 24       | 31        |

**Figure S16.** Table 2, entry 1m - Quantitative GC-FID spectrum of the formal [2+2+2] cycloaddition of trimethyl(*n*-butylethynyl)silane and Cp\*<sub>2</sub>ZrPh<sub>2</sub> with TiI<sub>4</sub>(THF)<sub>2</sub> (1 mol %), Zn<sup>0</sup> (1 mol %), and 1,3,5-trimethoxybenzene internal standard.

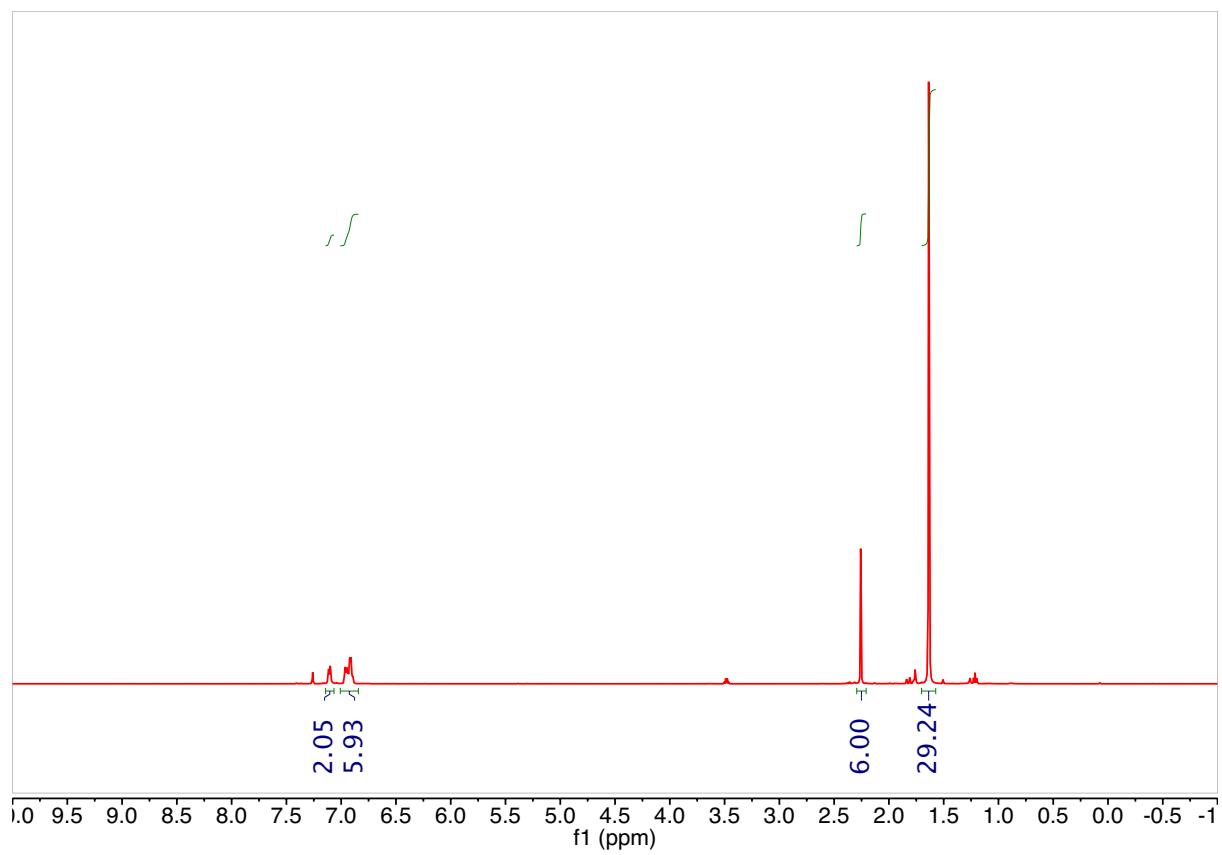

**Figure S17.**  $^1\text{H}$  NMR spectrum ( $\text{CDCl}_3$ ) of **8**.

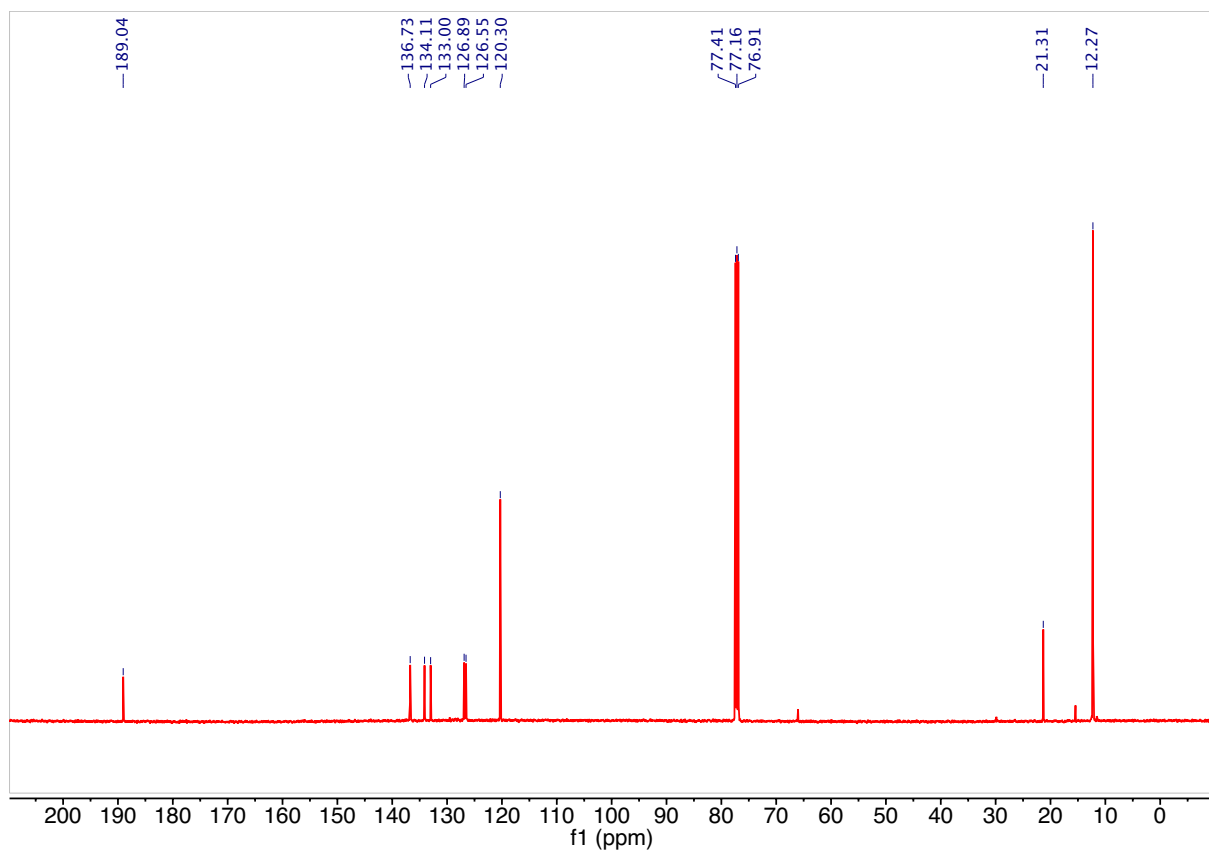

**Figure S18.**  $^{13}\text{C}\{^1\text{H}\}$  NMR spectrum ( $\text{CDCl}_3$ ) of **8**.

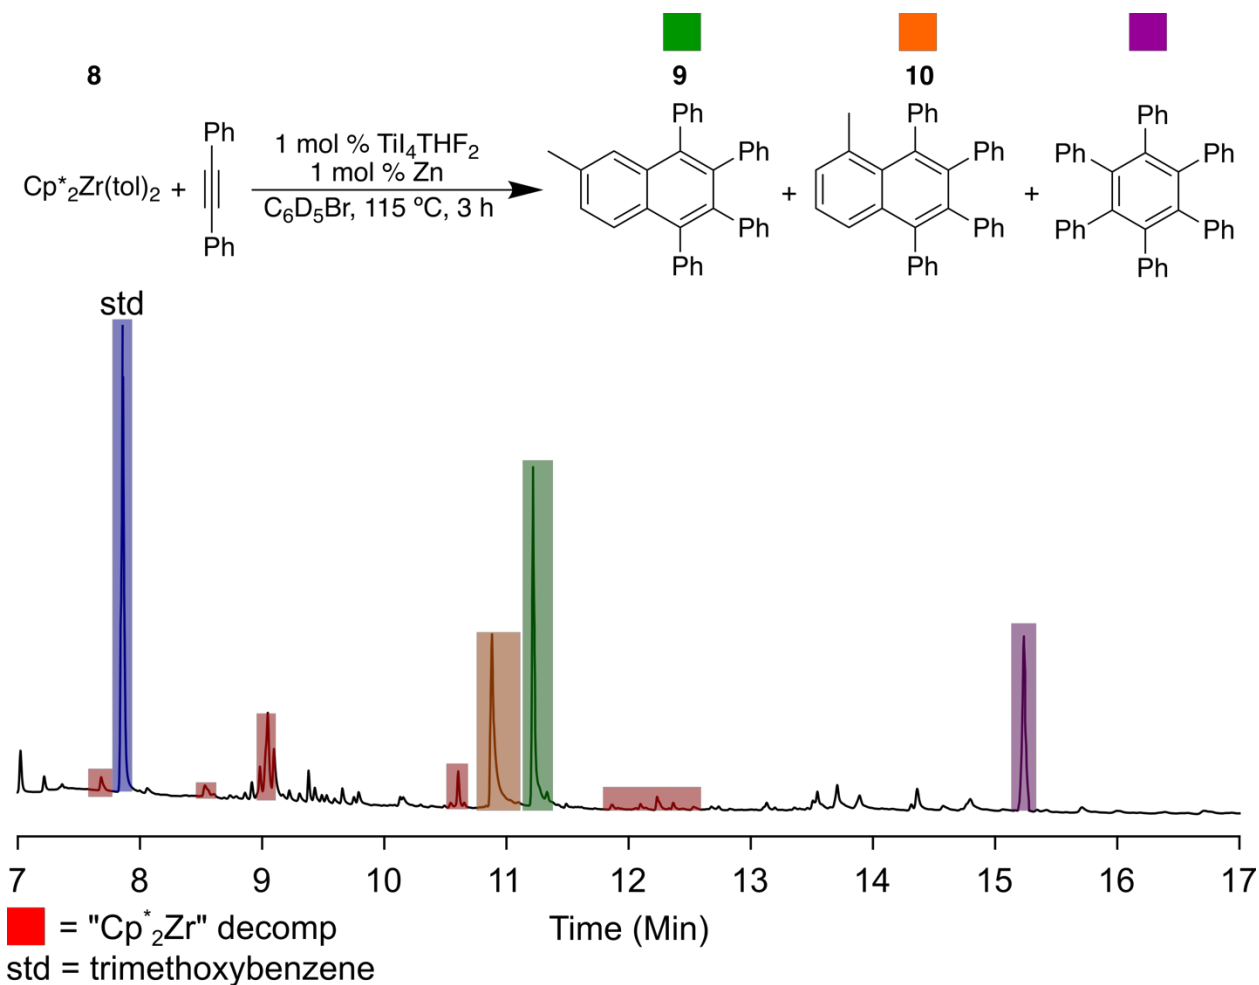

| Product               | Retention time (min) | Peak area (a.u.) | Carbon # | Yield (%) |
|-----------------------|----------------------|------------------|----------|-----------|
| trimethoxybenzene     | 7.869                | 2611.1           | 9        | N/A       |
| naphthalene <b>10</b> | 10.899               | 861.5            | 28       | 21        |
| naphthalene <b>9</b>  | 11.220               | 1731.1           | 28       | 43        |
| trimer                | 15.490               | 665.0            | 36       | 19        |

**Figure S19.** Quantitative GC-FID spectrum of the formal [2+2+2] cycloaddition of diphenylacetylene and **8** with  $\text{TiI}_4(\text{THF})_2$  (1 mol %),  $\text{Zn}^0$  (1 mol %) and 1,3,5-trimethoxybenzene internal standard.

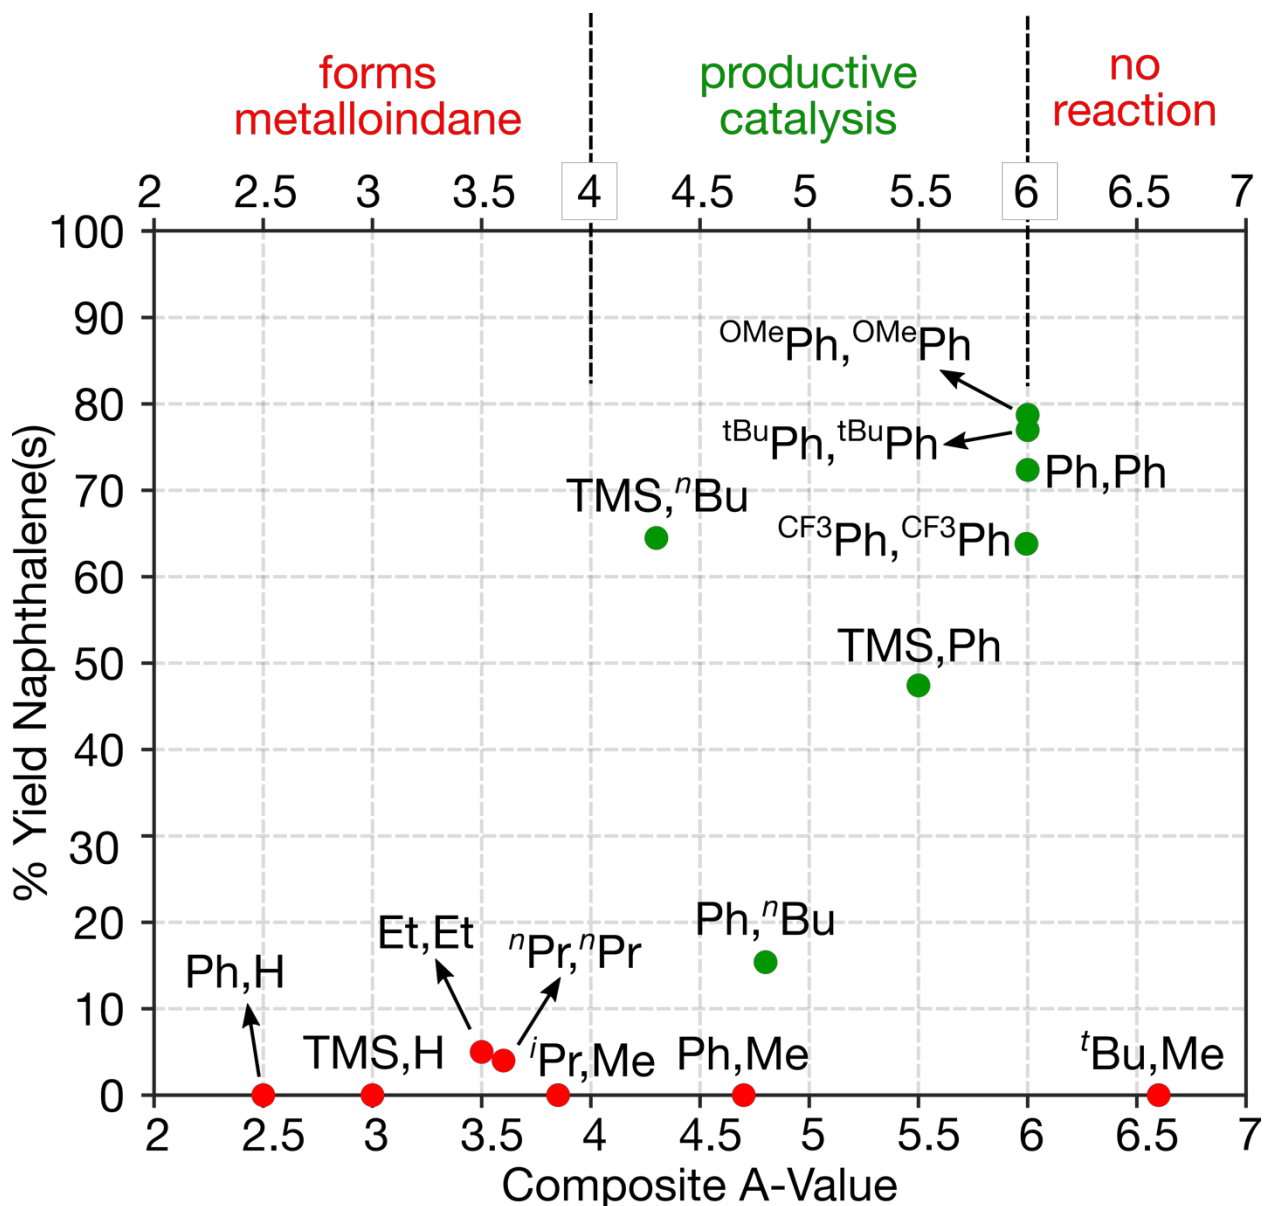

**Figure S20.** Alkyne “composite A-values” vs total yield of naphthalene products formed during the formal [2+2+2] cycloaddition of an alkyne and  $\text{Cp}^*\text{ZrPh}_2$  with  $\text{TiI}_4(\text{THF})_2$  (1 mol %) and  $\text{Zn}^0$  (1 mol %). Composite A-value was calculated by summing the A-value of both substituents of the alkyne coupling partner. Red dots correspond to reactions where naphthalene products were delivered in < 10% yield while green dots correspond to reactions where higher yields of naphthalene products were observed. Each dot is labeled according to the substituents of the alkyne coupling partner. The dotted lines above the plot designate regions where the size of the alkyne is appropriate for productive catalysis.

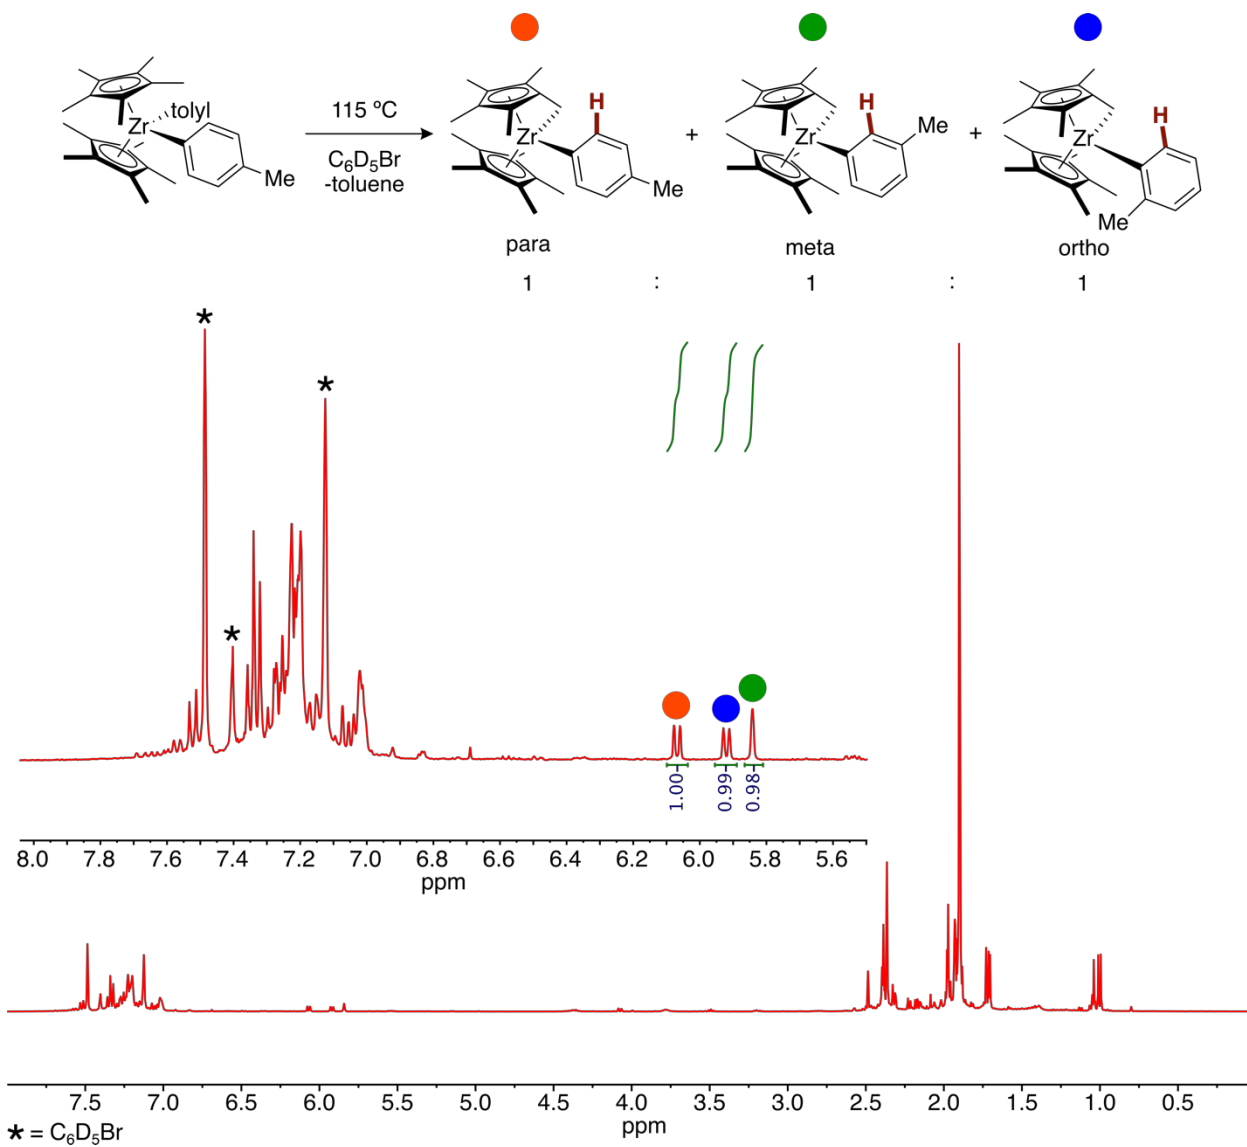

**Figure S21.**  $^1H$  NMR spectrum ( $C_6D_5Br$ ) of the thermolysis of **8** after 1 h.

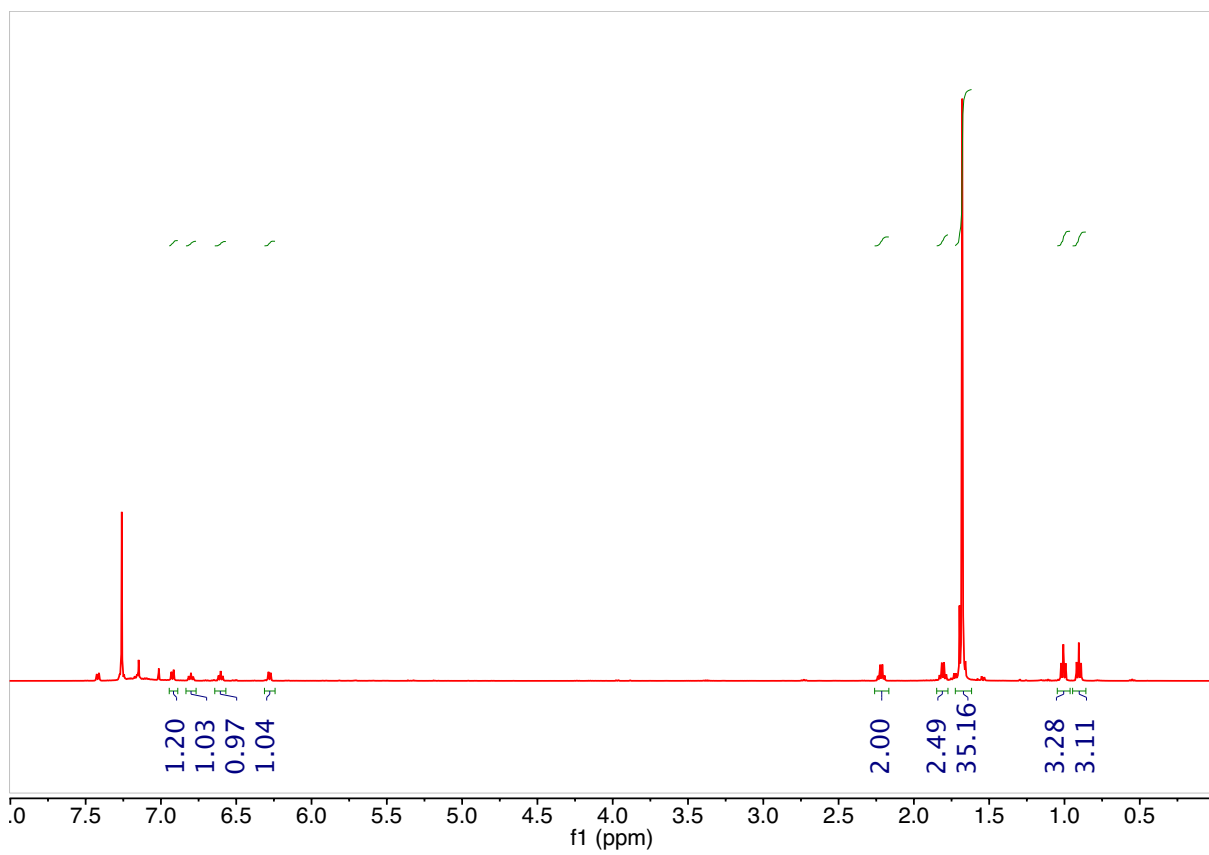

**Figure S22.**  $^1\text{H}$  NMR spectrum ( $\text{CDCl}_3$ ) of **7a**.



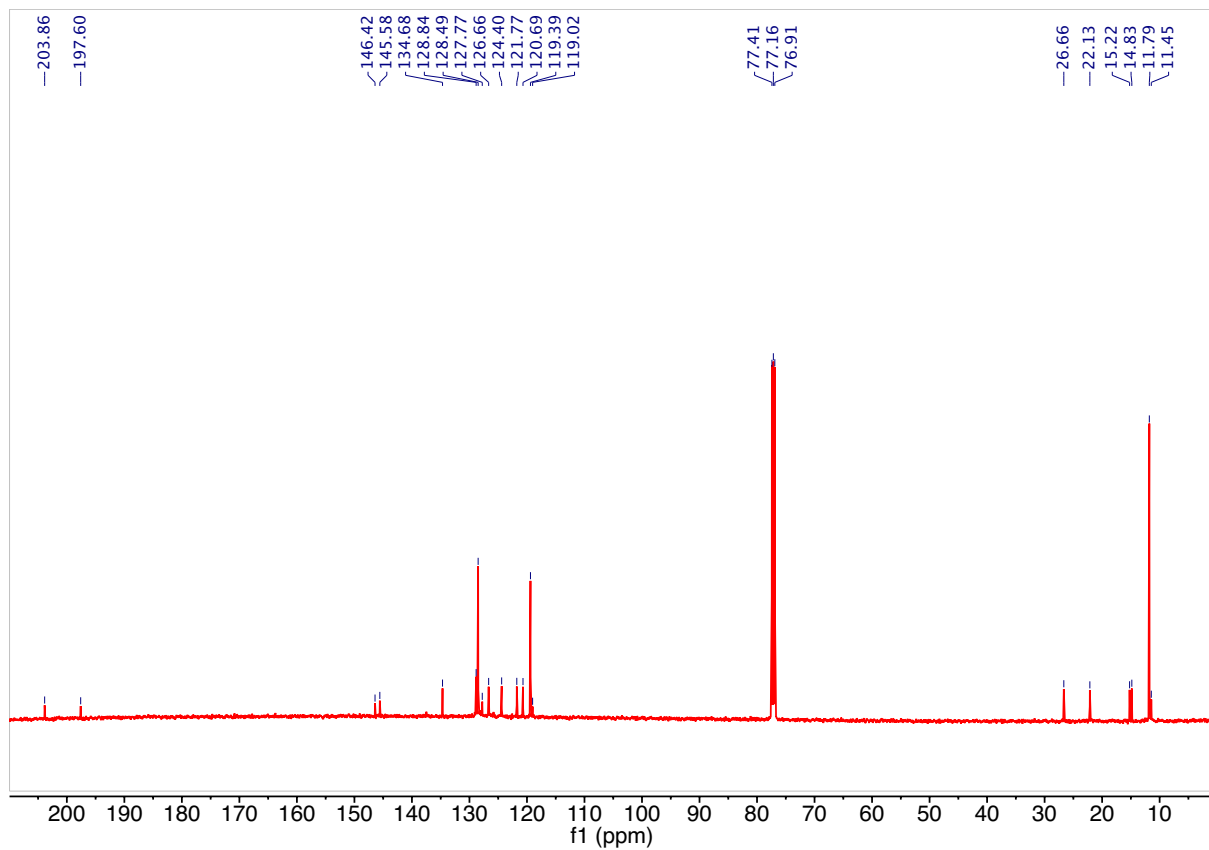

**Figure S23.**  $^{13}\text{C}\{^1\text{H}\}$  NMR spectrum ( $\text{CDCl}_3$ ) of **7a**.

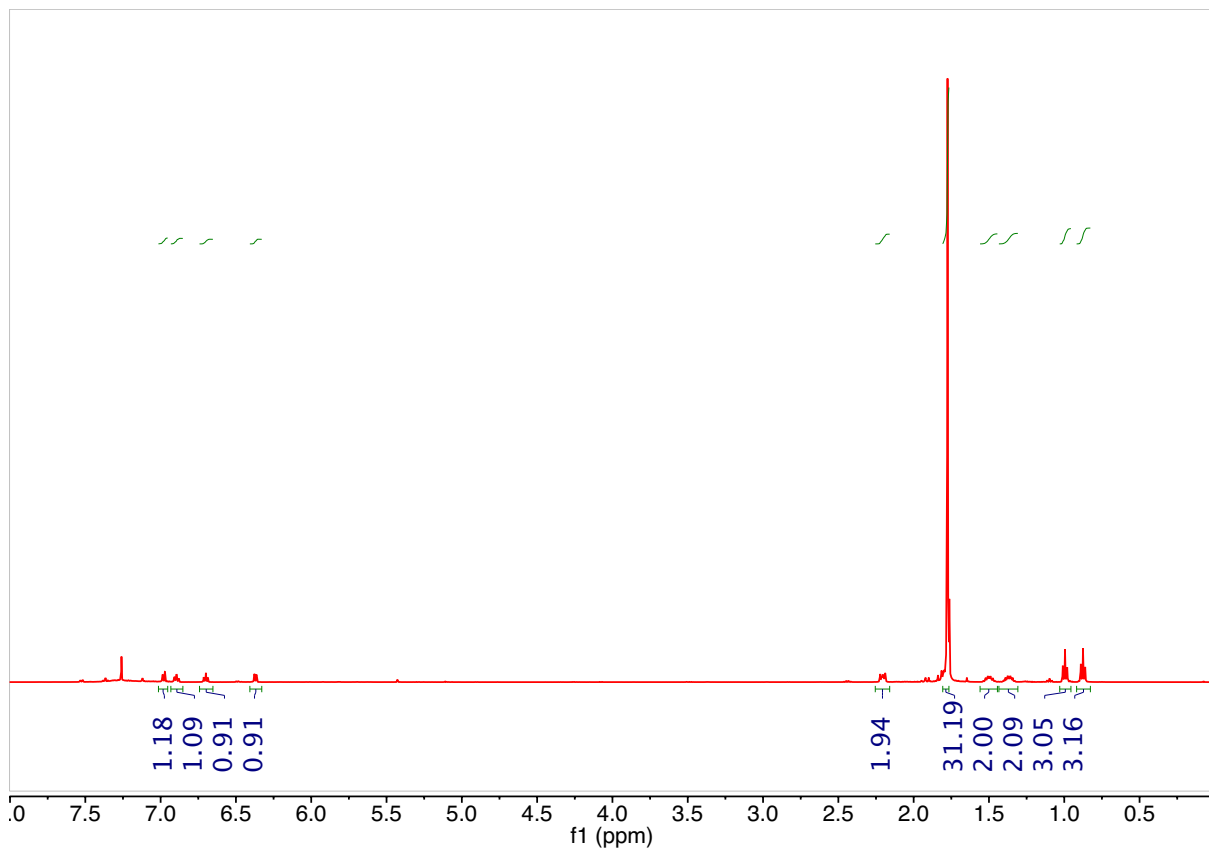

**Figure S24.** <sup>1</sup>H NMR spectrum (CDCl<sub>3</sub>) of **7b**.

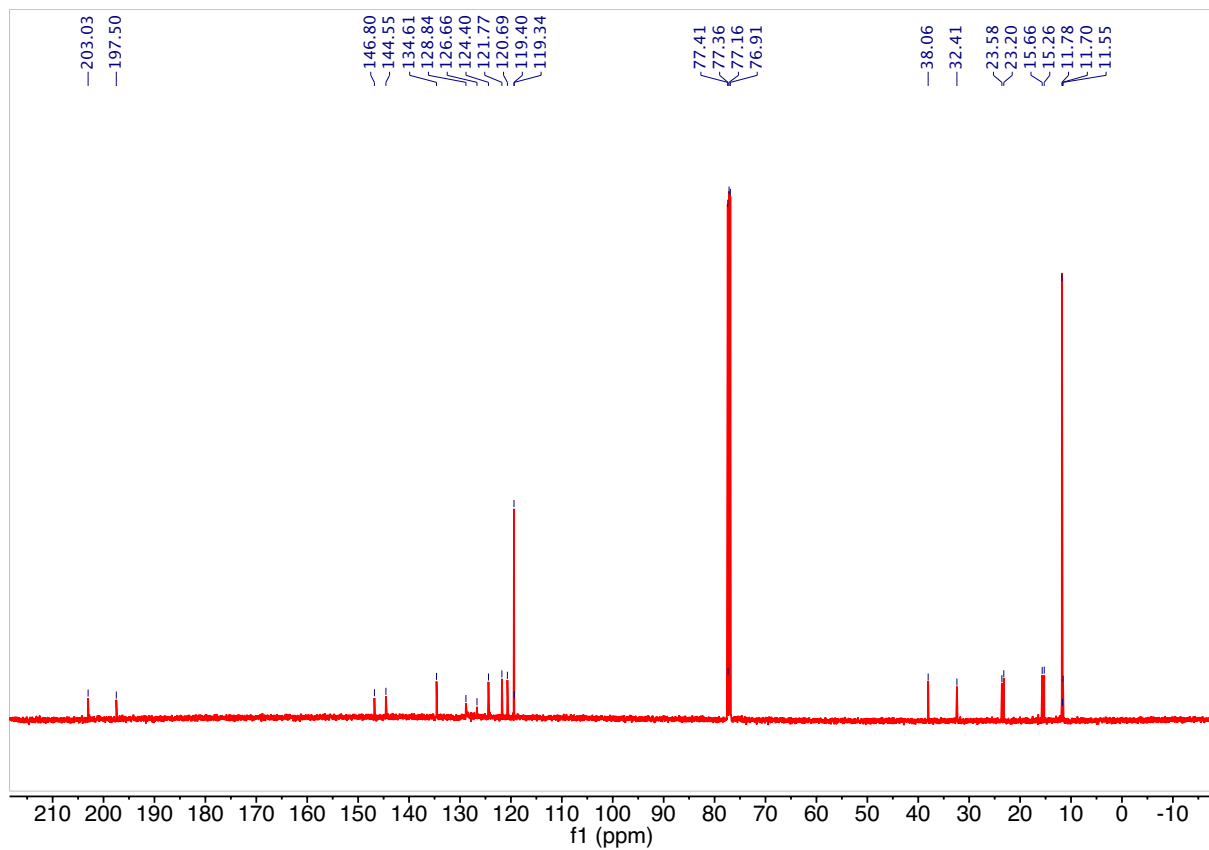

**Figure S25.**  $^{13}\text{C}\{^1\text{H}\}$  NMR spectrum ( $\text{CDCl}_3$ ) of **7b**.

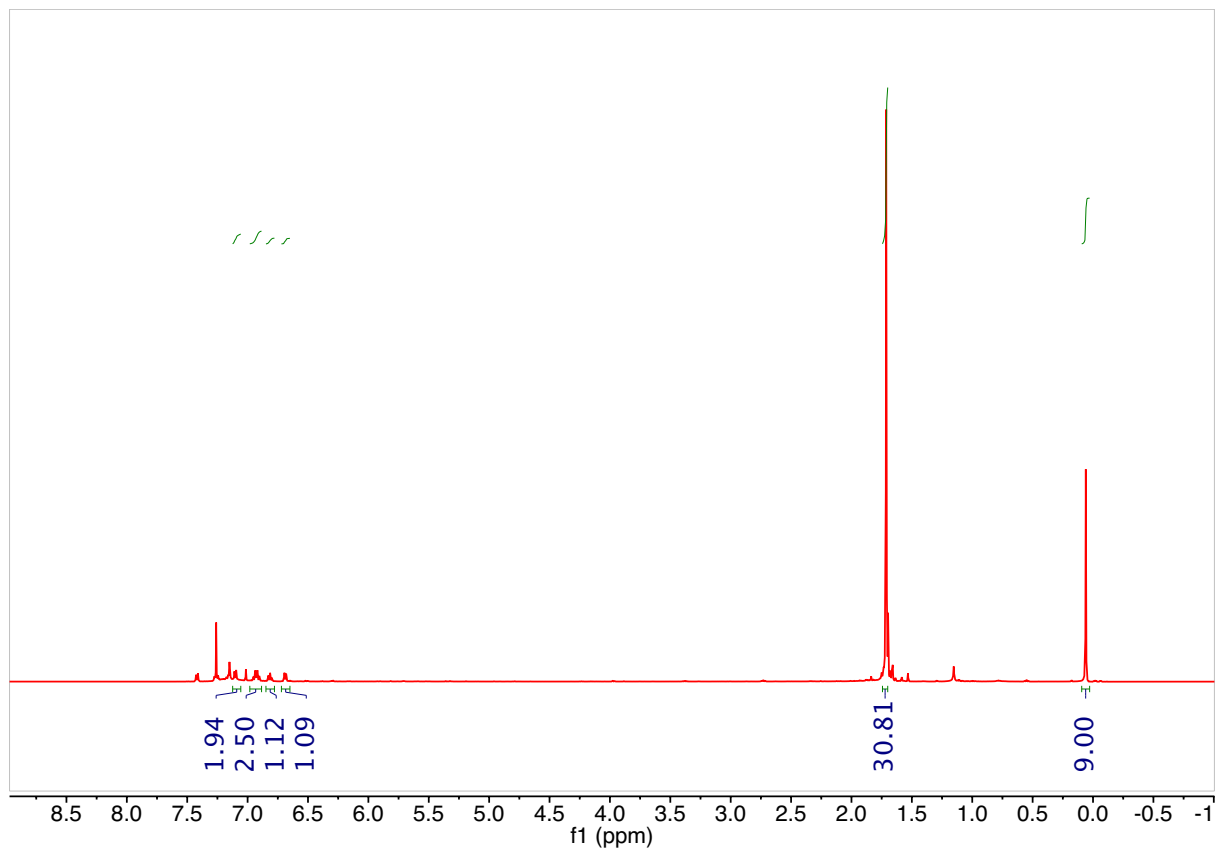

**Figure S26.**  $^1\text{H}$  NMR spectrum ( $\text{CDCl}_3$ ) of **7c**.

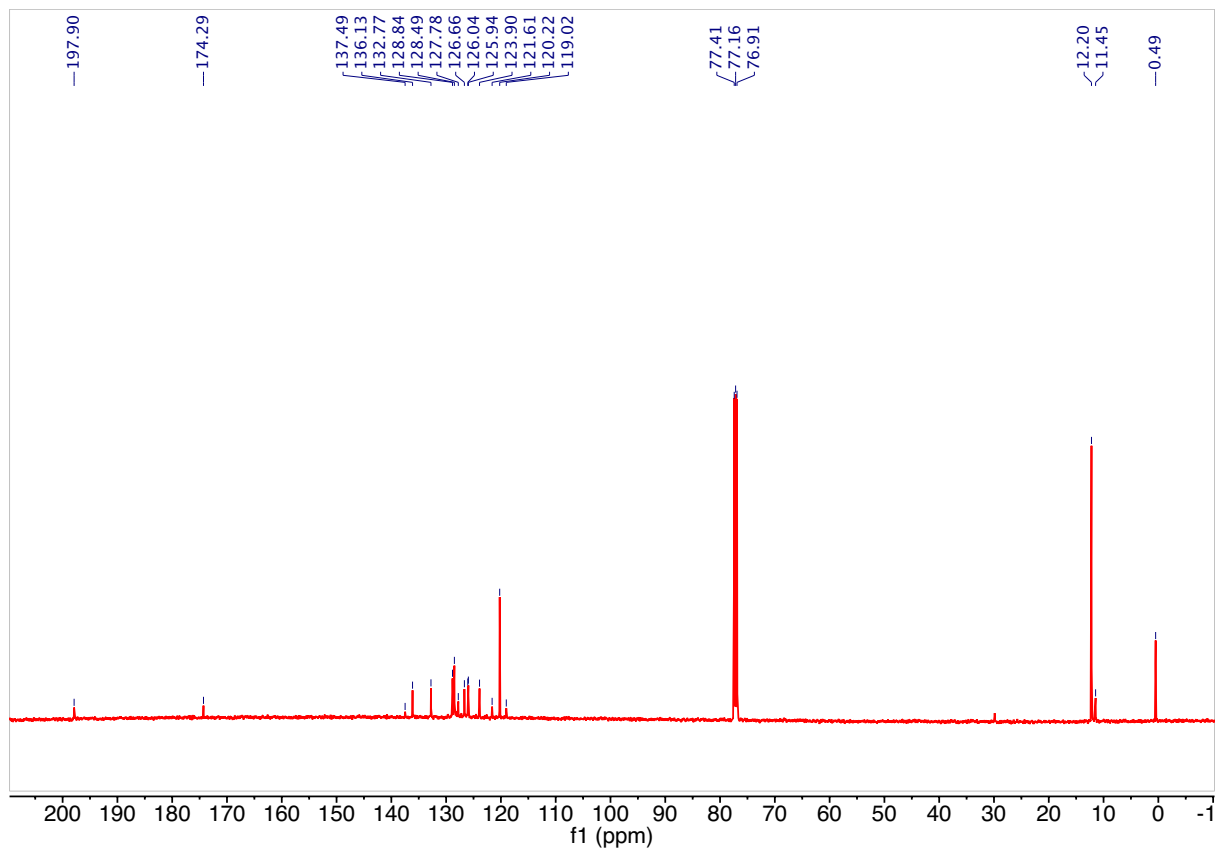

**Figure S27.**  $^{13}\text{C}\{^1\text{H}\}$  NMR spectrum ( $\text{CDCl}_3$ ) of **7c**.

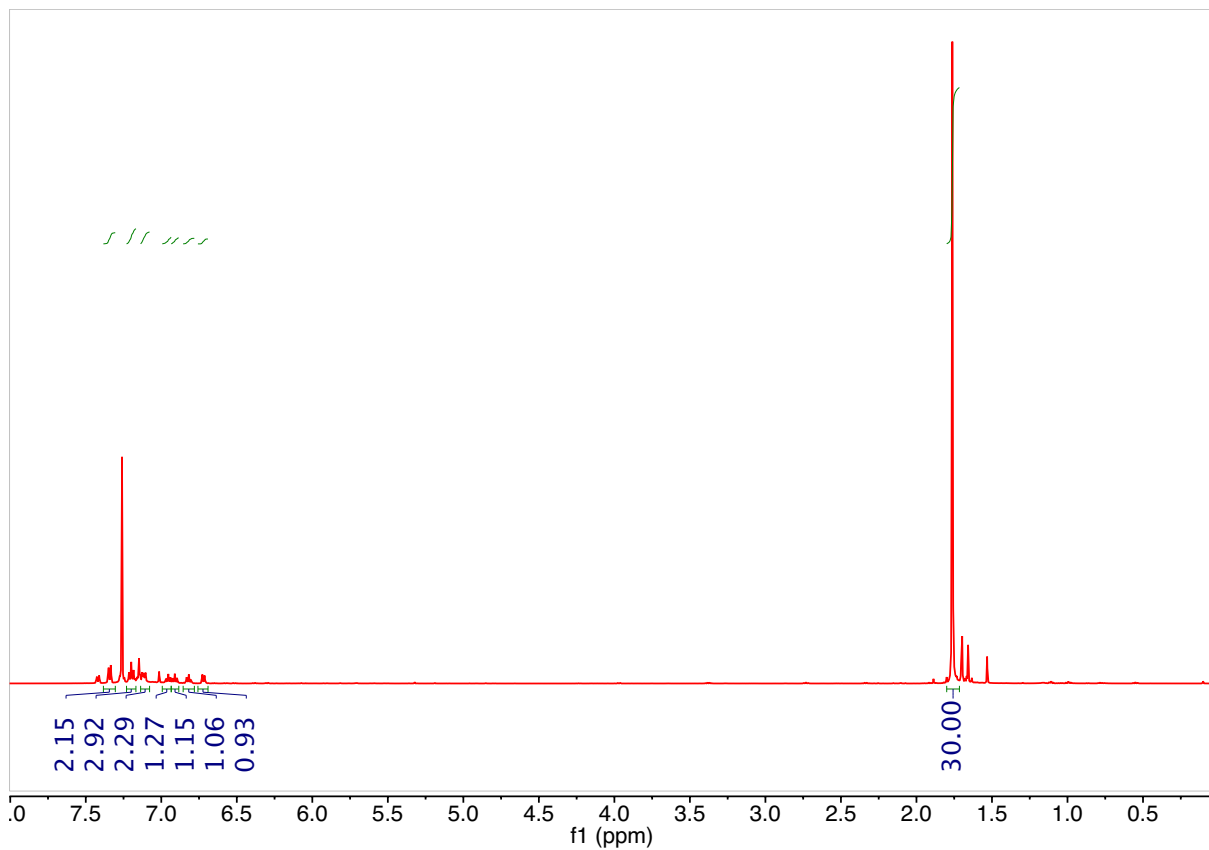

**Figure S28.**  $^1\text{H}$  NMR spectrum ( $\text{CDCl}_3$ ) of **7d**.

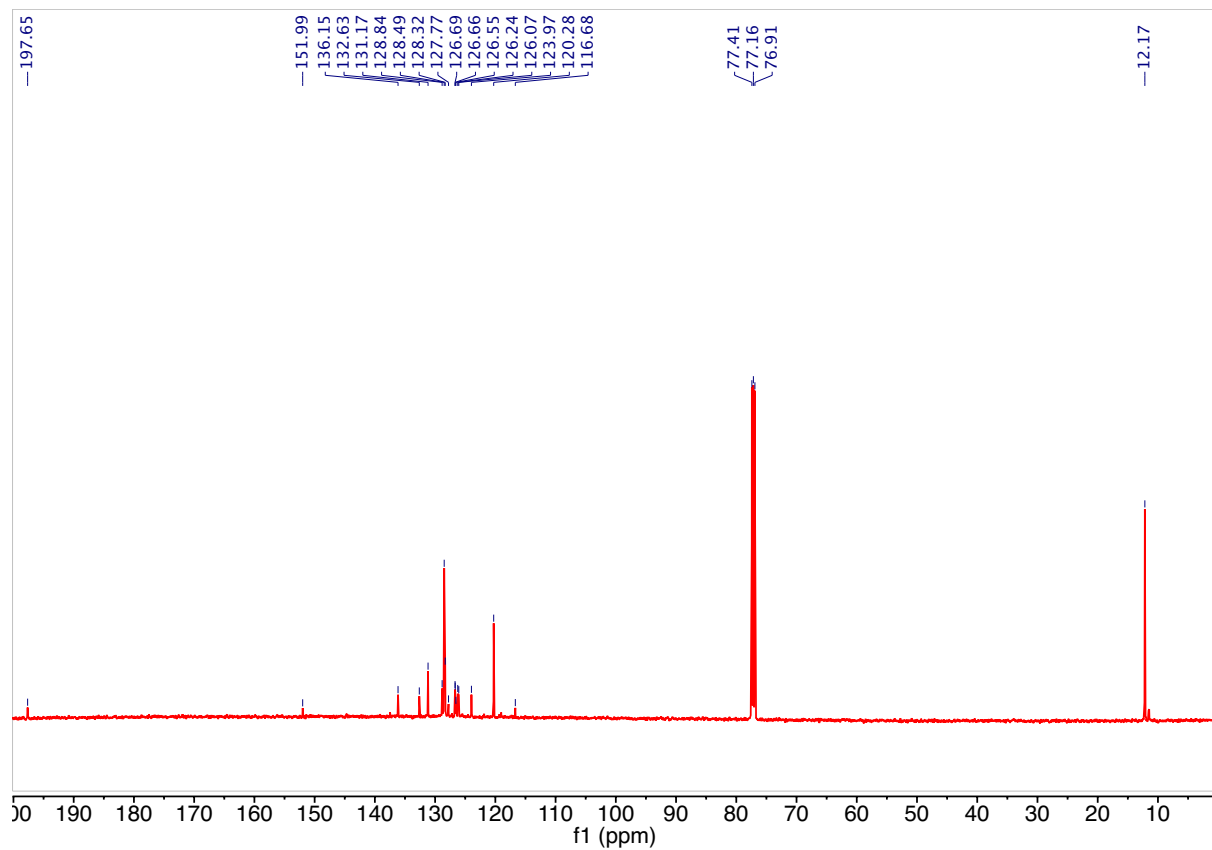

**Figure S29.**  $^{13}\text{C}\{^1\text{H}\}$  NMR spectrum ( $\text{CDCl}_3$ ) of **7d**.

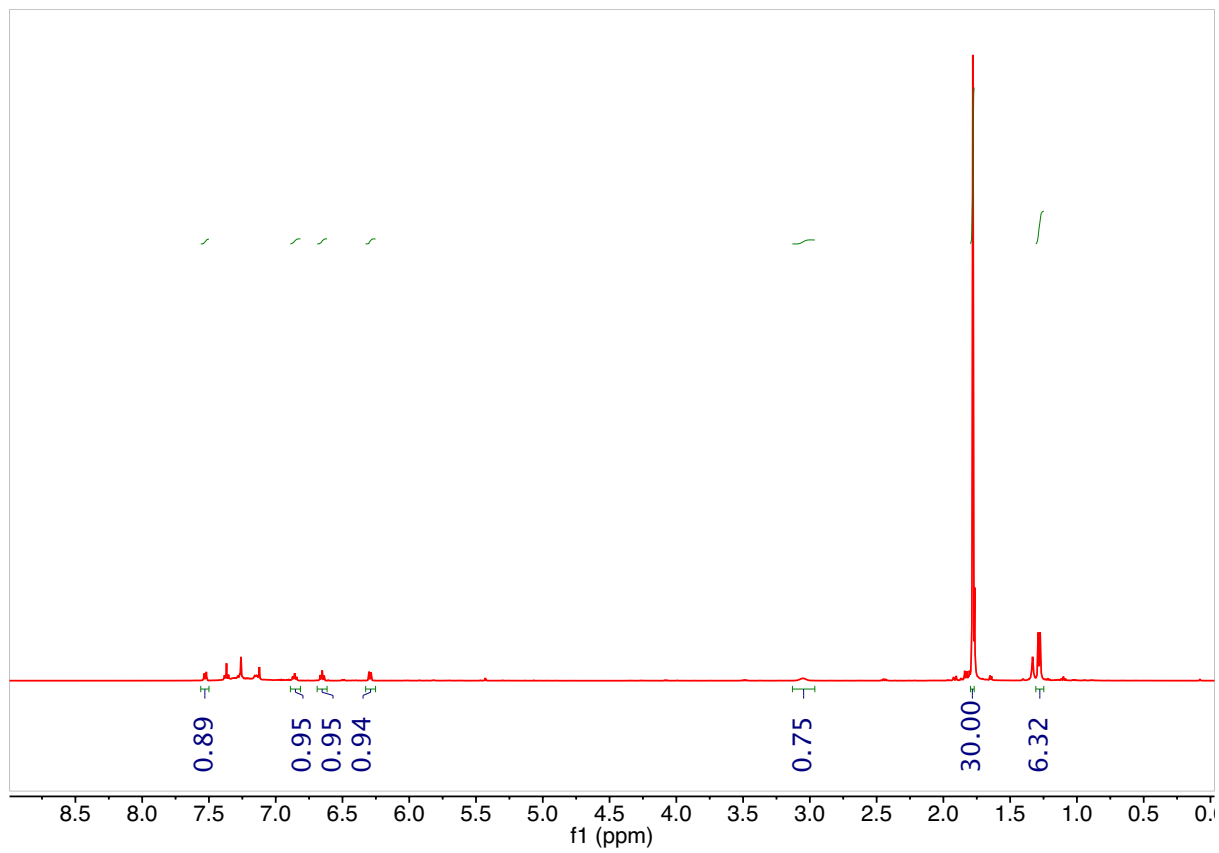

**Figure S30.**  $^1\text{H}$  NMR spectrum ( $\text{CDCl}_3$ ) of **7e**.



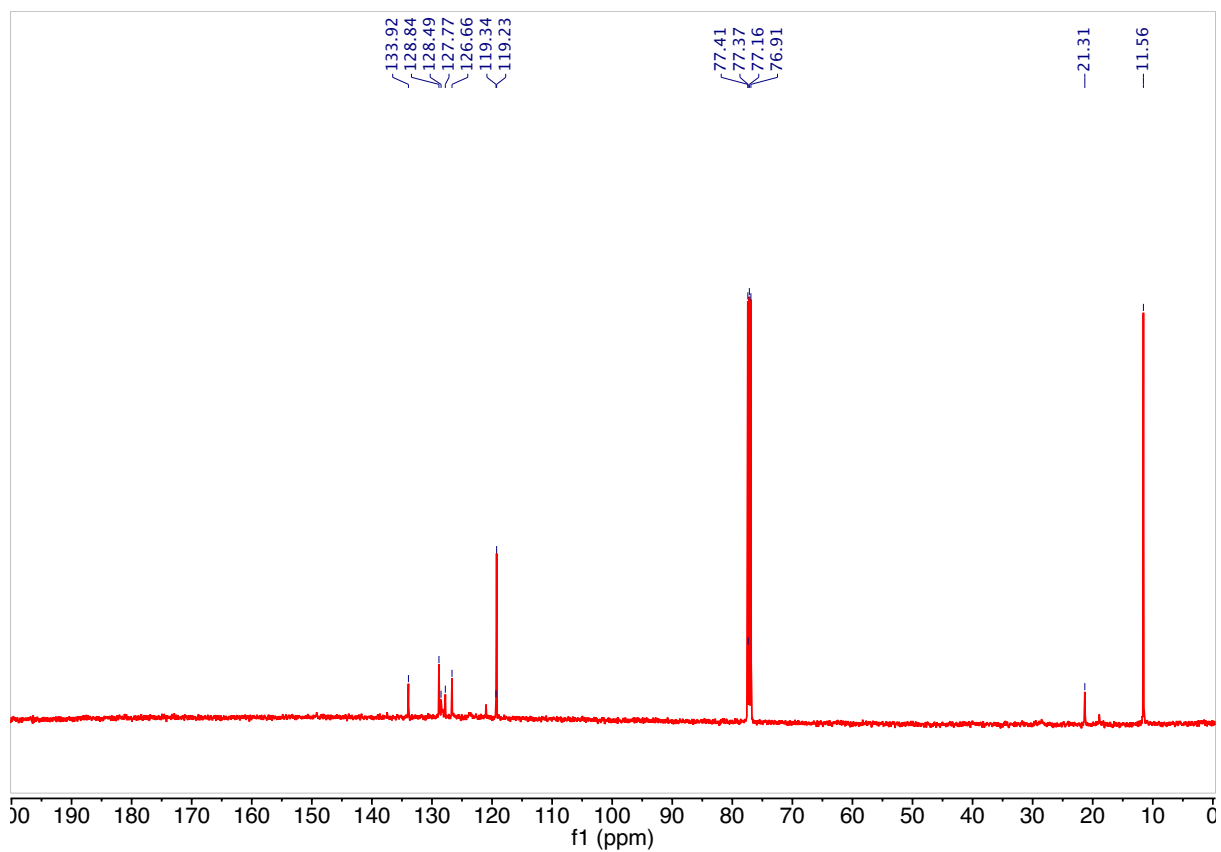

**Figure S31.**  $^{13}\text{C}\{^1\text{H}\}$  NMR spectrum ( $\text{CDCl}_3$ ) of **7e**.

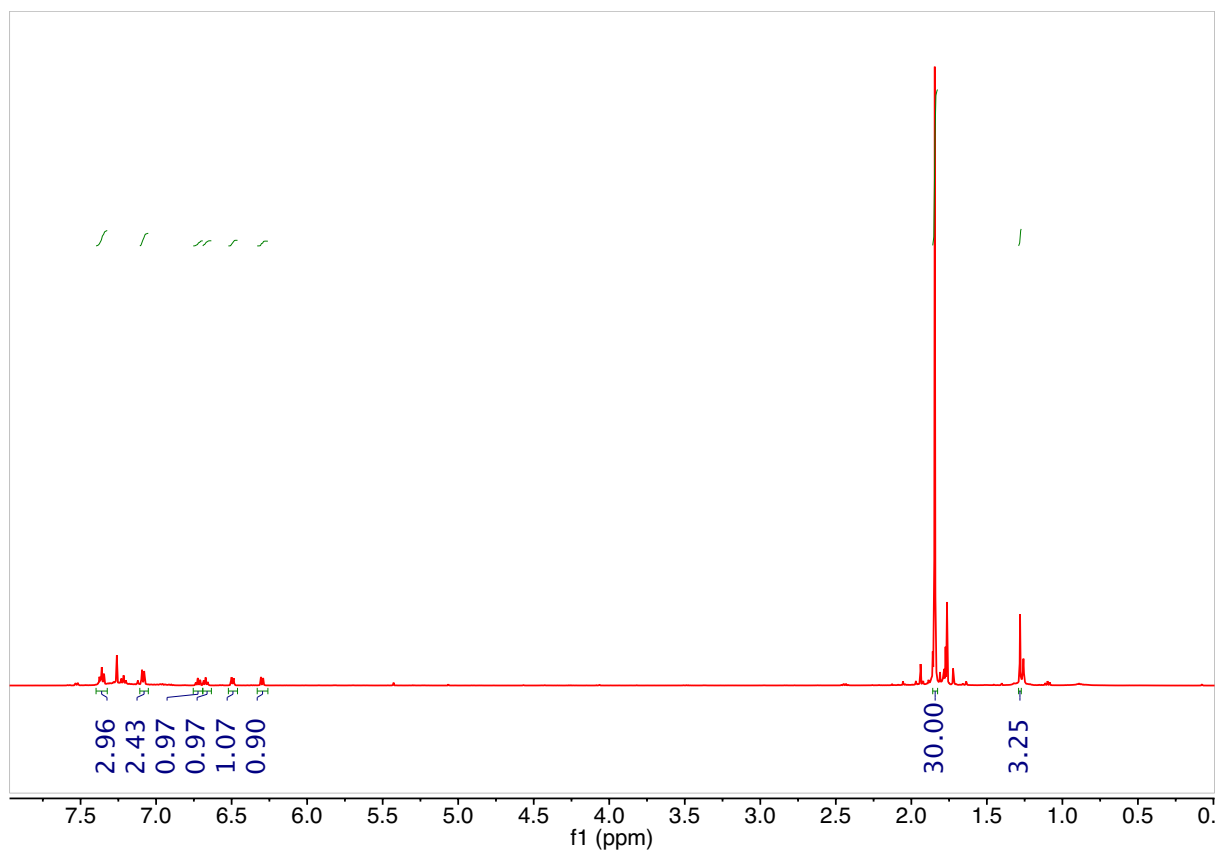

**Figure S32.**  $^1\text{H}$  NMR spectrum ( $\text{CDCl}_3$ ) of **7f**.

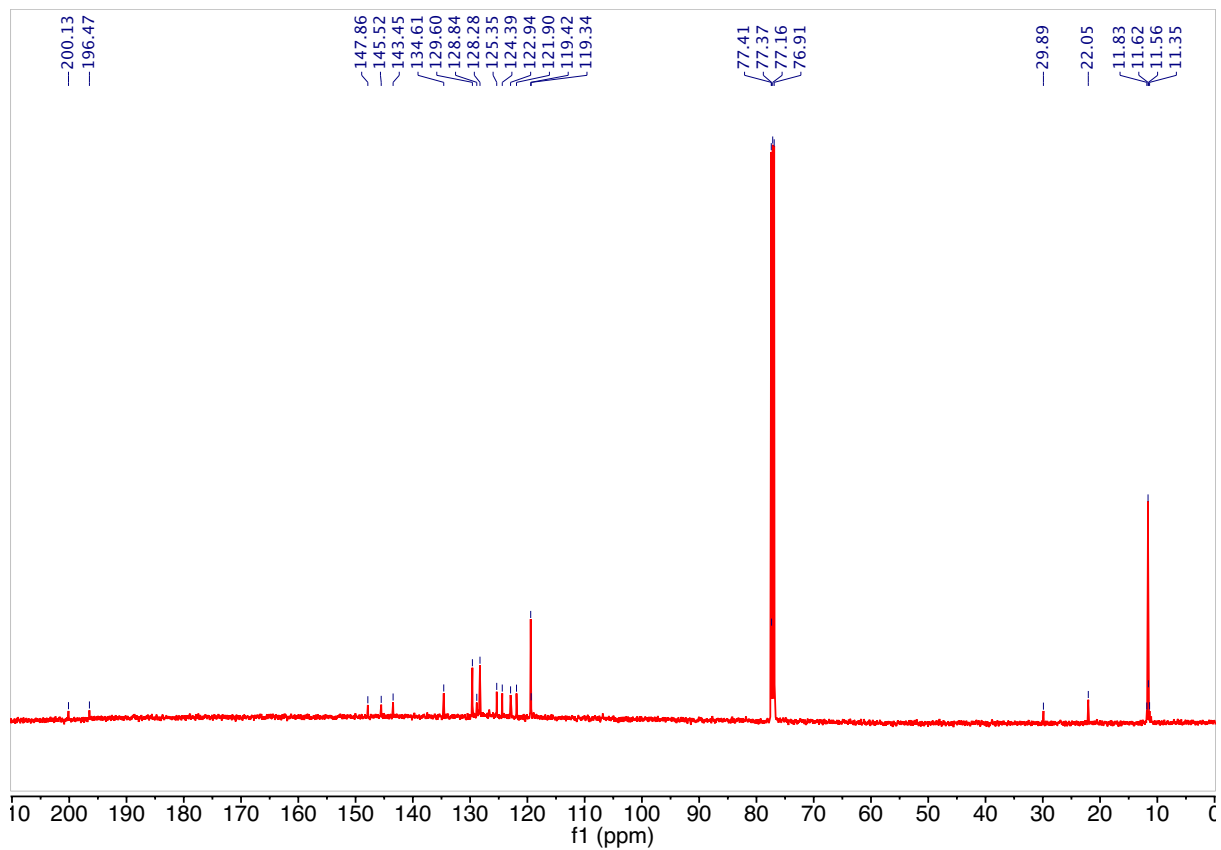

**Figure S33.**  $^{13}\text{C}\{^1\text{H}\}$  NMR spectrum ( $\text{CDCl}_3$ ) of **7f**.
